# Supplementary material for: KOtBu-promoted synthesis of multi-substituted 4-aminopyrimidines from benzonitriles and aliphatic amides
Source: Royal Society of Chemistry journal article supplement (doi:10.1039/c5ra24292d), 2015-01-01

**Procedure for model system:** Under air, in a 25 mL reaction tube equipped with a stirring bar, benzonitrile (3 mmol), <sup>t</sup>BuOK (2 mmol) and DMAc (2 mL) were added. Then close the tube and heat it up to 110 °C for 16 h., cool the reaction mixture to room temperature when the reaction completed. The reaction solution was quenched with distilled water and extracted with ethyl acetate three times. The combined organic phases were washed with saturated NaCl solution and dried over Na<sub>2</sub>SO<sub>4</sub>. The crude product was purified by column chromatography to give the pure product.

#### *N, N*-Dimethyl-2, 6-diphenylpyrimidin-4-amine

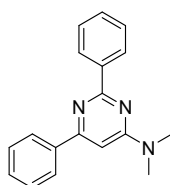

**<sup>1</sup>H NMR (300 MHz, Chloroform-*d*)** δ 8.71 – 8.53 (m, 2H), 8.25 – 8.07 (m, 2H), 7.61 – 7.41 (m, 6H), 6.75 (s, 1H), 3.26 (s, 6H).

**<sup>13</sup>C NMR (75 MHz, Chloroform-*d*)** δ 163.48, 163.44, 163.14, 139.11, 138.96, 130.20, 130.00, 128.79, 128.44, 128.33, 127.26, 125.13, 96.18, 37.42.

**GC-MS (EI, 70ev):** *m/z*(%) = 246 (M+, 100), 276 (16), 275 (78), 261 (14), 260 (72), 247 (20), 232 (19), 231 (10).

**HRMS(ESI):** calcd. for [C<sub>18</sub>H<sub>17</sub>N<sub>3</sub> + H]<sup>+</sup>: 276.14952 ; found: 276.15003.

#### *N, N*-Dimethyl-2, 6-di-*p*-tolylpyrimidin-4-amine

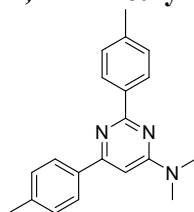

**<sup>1</sup>H NMR (300 MHz, Chloroform-*d*)** δ 8.42 (d, *J* = 8.2 Hz, 2H), 8.00 (d, *J* = 8.1 Hz, 2H), 7.33 – 6.99 (m, 4H), 6.65 (s, 1H), 3.20 (s, 6H), 2.38 (s, 6H).

**<sup>13</sup>C NMR (75 MHz, Chloroform-*d*)** δ 163.49, 163.44, 163.05, 140.18, 140.07, 136.47, 136.20, 129.48, 25.46 – 16.39 (m), 129.07, 128.41, 127.16, 95.54, 37.40, 21.70, 21.60.

**GC-MS (EI, 70ev):** *m/z*(%) = 274 (M+, 100), 304 (15), 303 (67), 289 (15), 288 (66), 275 (21), 260 (16), 142 (19), 118 (27), 117 (11), 116 (35), 115 (38), 91 (11), 89 (12).

**HRMS(ESI):** calcd. for [C<sub>20</sub>H<sub>21</sub>N<sub>3</sub> + H]<sup>+</sup>: 304.18082; found: 304.18121.

#### *N, N*-Dimethyl-2,6-di-*o*-tolylpyrimidin-4-amine

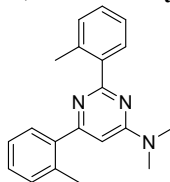

**<sup>1</sup>H NMR (300 MHz, Chloroform-*d*)** δ 7.96 – 7.80 (m, 1H), 7.45 (dt, *J* = 6.6, 1.7 Hz, 1H), 7.36 – 7.15 (m, 6H), 6.44 (s, 1H), 3.20 (s, 5H), 2.64 (s, 3H), 2.49 (s, 3H).

**<sup>13</sup>C NMR (75 MHz, Chloroform-*d*)** δ 166.20, 162.59, 140.16, 139.65, 137.19, 136.13, 131.16, 130.89, 130.57, 129.47, 128.87, 128.75, 125.95, 125.80, 99.69, 37.41, 21.73, 20.70.

**GC-MS (EI, 70ev):** *m/z*(%) = 302 (M+, 100), 304 (18), 303 (93), 288 (47), 116 (16), 115 (24), 89 (10).

**HRMS(ESI):** calcd. for [C<sub>20</sub>H<sub>21</sub>N<sub>3</sub> + H]<sup>+</sup>: 304.18082; found: 304.18128.

### *N,N*-Dimethyl-2, 6-di(naphthalen-2-yl)pyrimidin-4-amine

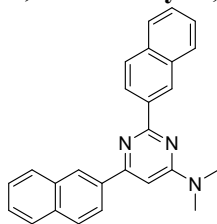

<sup>1</sup>H NMR (300 MHz, Chloroform-*d*) δ 9.35 – 9.10 (m, 1H), 8.86 – 8.60 (m, 2H), 8.30 (dd, *J* = 8.6, 1.8 Hz, 1H), 8.14 – 7.77 (m, 6H), 7.67 – 7.39 (m, 4H), 6.89 (s, 1H), 3.32 (s, 6H).

<sup>13</sup>C NMR (75 MHz, Chloroform-*d*) δ 163.47, 163.06, 136.56, 136.26, 134.75, 134.43, 133.55 (d, *J* = 3.3 Hz), 129.40, 128.49, 128.44, 127.89 (d, *J* = 2.1 Hz), 127.04, 126.95, 126.79, 126.49, 126.08, 125.91, 124.75, 96.58, 37.53.

GC-MS (EI, 70ev): *m/z*(%) = 346 (M<sup>+</sup>, 100), 376 (19), 375 (73), 361 (15), 360 (55), 347 (26), 332 (17), 178 (29), 177 (12), 154 (16), 153 (24), 152 (41), 151 (20), 127 (13).

HRMS(ESI): calcd. for [C<sub>26</sub>H<sub>21</sub>N<sub>3</sub> + H]<sup>+</sup>: 376.18082; found: 376.18111.

### *N,N*-Dimethyl-2, 6-di(pyridin-4-yl)pyrimidin-4-amine

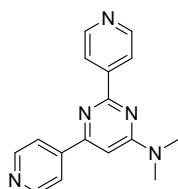

<sup>1</sup>H NMR (300 MHz, Chloroform-*d*) δ 8.74 (td, *J* = 4.4, 1.7 Hz, 4H), 8.42 – 8.28 (m, 2H), 8.01 – 7.90 (m, 2H), 6.81 (s, 1H), 3.25 (s, 6H).

<sup>13</sup>C NMR (75 MHz, Chloroform-*d*) δ 163.34, 161.83, 160.68, 150.61, 150.25, 146.04, 145.62, 122.34, 121.24, 97.99, 37.53.

GC-MS (EI, 70ev): *m/z*(%) = 277 (M<sup>+</sup>, 100), 278 (20), 263 (14), 262 (77), 249 (15), 248 (90), 234 (18), 130 (33), 129 (36), 105 (67), 104 (15), 103 (61), 102 (15), 78 (35), 76 (23), 75 (10), 51 (21), 44 (44).

HRMS(ESI): calcd. for [C<sub>16</sub>H<sub>15</sub>N<sub>3</sub> + H]<sup>+</sup>: 278.14002; found: 278.14047.

### *N,N*-Dimethyl-2, 6-di(pyridin-3-yl)pyrimidin-4-amine

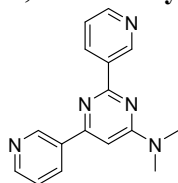

<sup>1</sup>H NMR (300 MHz, Chloroform-*d*) δ 9.68 (dd, *J* = 2.2, 0.9 Hz, 1H), 9.25 (dd, *J* = 2.3, 0.9 Hz, 1H), 8.73 (dt, *J* = 7.9, 1.9 Hz, 1H), 8.66 (ddd, *J* = 5.0, 3.5, 1.7 Hz, 2H), 8.39 (ddd, *J* = 8.0, 2.3, 1.7 Hz, 1H), 7.37 (dddd, *J* = 9.6, 7.9, 4.8, 0.9 Hz, 2H), 6.70 (s, 1H), 3.21 (s, 6H).

<sup>13</sup>C NMR (75 MHz, Chloroform-*d*) δ 163.03, 161.85, 160.51, 150.95, 150.12, 148.43, 135.65, 134.36 – 133.05 (m), 134.65, 134.07, 133.99, 123.65, 123.24, 96.69, 37.41.

GC-MS (EI, 70ev): *m/z*(%) = 277 (M<sup>+</sup>, 100), 278 (19), 263 (14), 262 (73), 249 (16), 248 (90), 234 (24), 130 (41), 129 (55), 105 (65), 104 (15), 103 (61), 102 (19), 78 (22), 76 (23), 75 (10), 51 (13), 44 (22).

HRMS(ESI): calcd. for [C<sub>16</sub>H<sub>15</sub>N<sub>3</sub> + H]<sup>+</sup>: 278.14002; found: 278.1404.

### 2, 6-Bis (3-methoxyphenyl)-*N,N*-dimethylpyrimidin-4-amine

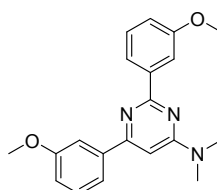

**<sup>1</sup>H NMR (300 MHz, Chloroform-*d*)** δ 8.27 – 8.09 (m, 1H), 7.76 (dd, *J* = 2.6, 1.6 Hz, 1H), 7.69 (ddd, *J* = 7.7, 1.6, 0.9 Hz, 1H), 7.40 (td, *J* = 7.8, 0.7 Hz, 1H), 7.07 – 6.97 (m, 1H), 6.72 (s, 0H), 3.92 (d, *J* = 1.6 Hz, 3H), 3.23 (s, 3H).

**<sup>13</sup>C NMR (75 MHz, Chloroform-*d*)** δ 163.34, 163.14, 162.79, 160.07, 159.78, 140.60, 140.39, 129.73, 129.28, 121.03, 119.59, 116.04, 115.51, 113.59, 112.87, 96.41, 55.54 (d, *J* = 5.6 Hz), 37.37.

**GC-MS (EI, 70ev):** *m/z*(%) = 306 (M<sup>+</sup>, 100), 336 (20), 335 (97), 334 (69), 321 (12), 320 (59), 307 (21), 305 (26), 292 (13), 291 (10), 168 (30), 158 (25), 143 (12), 134 (30), 132 (42), 115 (13), 103 (14), 102 (16), 89 (12), 44 (13).

**HRMS(ESI):** calcd. for [C<sub>20</sub>H<sub>21</sub>N<sub>3</sub>O<sub>2</sub> + H]<sup>+</sup>: 336.17065; found: 336.17106.

## 2, 6-Bis (4-methoxyphenyl)-*N, N*-dimethylpyrimidin-4-amine

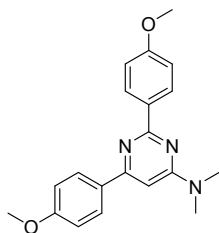

**<sup>1</sup>H NMR (300 MHz, Chloroform-*d*)** δ 8.66 – 8.41 (m, 2H), 8.23 – 7.95 (m, 2H), 7.11 – 6.88 (m, 4H), 6.62 (s, 1H), 3.87 (d, *J* = 1.9 Hz, 6H), 3.22 (s, 6H).

**<sup>13</sup>C NMR (75 MHz, Chloroform-*d*)** δ 163.34, 163.05, 162.49, 161.44, 161.24, 131.95, 131.49, 129.93, 58.77 – 53.84 (m), 128.57, 114.04, 113.57, 94.54, 55.54, 55.50, 37.33.

**GC-MS (EI, 70ev):** *m/z*(%) = 306 (M<sup>+</sup>, 100), 336 (14), 335 (65), 321 (12), 320 (58), 307 (19), 292 (10), 158 (22), 134 (16), 133 (10), 132 (18).

**HRMS(ESI):** calcd. for [C<sub>20</sub>H<sub>21</sub>N<sub>3</sub>O<sub>2</sub> + H]<sup>+</sup>: 336.17065; found: 336.17105.

## 2, 6-Bis (6-methoxynaphthalen-2-yl)-*N, N*-dimethylpyrimidin-4-amine

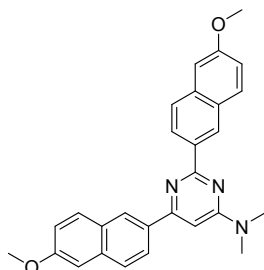

**<sup>1</sup>H NMR (300 MHz, Chloroform-*d*)** δ 9.06 (dd, *J* = 1.6, 0.8 Hz, 1H), 8.70 (dd, *J* = 8.6, 1.7 Hz, 1H), 8.66 – 8.59 (m, 1H), 8.26 (dd, *J* = 8.6, 1.8 Hz, 1H), 8.00 – 7.89 (m, 2H), 7.85 (dd, *J* = 8.7, 5.9 Hz, 2H), 7.25 – 7.12 (m, 4H), 6.86 (s, 1H), 3.96 (d, *J* = 1.0 Hz, 6H), 3.32 (s, 6H).

**<sup>13</sup>C NMR (75 MHz, Chloroform-*d*)** δ 163.37, 163.28, 162.86, 158.42, 158.34, 135.87, 135.58, 134.27, 133.87, 130.73, 130.43, 128.84, 128.79, 106.48 – 102.10 (m), 128.11, 126.69, 126.51, 126.30, 125.10, 119.16, 118.72, 105.71, 105.69, 95.74, 55.34 (d, *J* = 2.1 Hz), 37.34.

## *N, N*-Dimethyl-2, 6-bis(4-(methylthio)phenyl)pyrimidin-4-amine

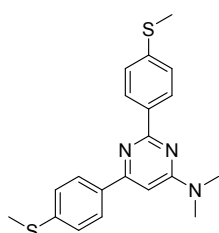

**<sup>1</sup>H NMR (300 MHz, Chloroform-*d*)** δ 8.60 – 8.37 (m, 1H), 8.15 – 7.93 (m, 1H), 7.41 – 7.27 (m, 2H), 6.65 (s, 1H), 3.21 (s, 3H), 2.54 (d, *J* = 1.2 Hz, 3H).

**<sup>13</sup>C NMR (75 MHz, Chloroform-*d*)** δ 163.31, 162.96, 162.29, 141.02, 135.87, 135.42, 128.77, 127.50, 126.23, 125.81, 95.34, 37.37, 15.67.

**GC-MS (EI, 70ev):** *m/z*(%) = 338 (M+, 100), 369 (10), 368 (21), 367 (88), 353 (13), 352 (55), 340 (11), 339 (24), 324 (10), 277 (14), 184 (14), 175 (12), 174 (55), 159 (20), 150 (31), 149 (17), 148 (54), 134 (11), 133 (15), 127 (11), 44 (22).

**HRMS(ESI):** calcd. for [C<sub>20</sub>H<sub>21</sub>N<sub>3</sub>S<sub>2</sub> + H]<sup>+</sup>: 368.12497; found: 368.12515.

## 2, 6-Bis (3-chlorophenyl)-*N,N*-dimethylpyrimidin-4-amine

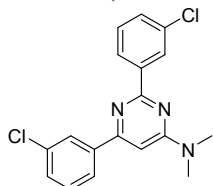

**<sup>1</sup>H NMR (300 MHz, Chloroform-*d*)** δ 8.52 (td, *J* = 1.7, 0.8 Hz, 1H), 8.45 (ddd, *J* = 6.3, 2.4, 1.6 Hz, 1H), 8.10 (dt, *J* = 1.8, 1.1 Hz, 1H), 8.01 (ddd, *J* = 5.5, 3.1, 1.7 Hz, 1H), 7.50 – 7.36 (m, 4H), 6.71 (s, 1H), 3.26 (s, 7H).

**<sup>13</sup>C NMR (75 MHz, Chloroform-*d*)** δ 163.17, 162.16, 161.57, 140.56, 140.34, 134.74, 134.28, 130.13, 129.92, 129.46, 128.31, 127.20, 126.44, 125.22, 96.54, 37.37.

**GC-MS (EI, 70ev):** *m/z*(%) = 314 (M+, 100), 345 (40), 344 (12), 343 (59), 330 (39), 329 (11), 328 (57), 318 (11), 317 (12), 316 (66), 315 (20), 265 (12), 172 (13), 164 (23), 163 (18), 162 (61), 140 (18), 139 (13), 138 (84), 137 (24), 136 (95), 128 (10), 127 (46), 126 (30), 111 (20), 103 (12), 102 (21), 101 (22), 100 (14), 76 (13), 75 (31), 68 (12), 55 (15), 44 (96), 42 (15).

**HRMS(ESI):** calcd. for [C<sub>18</sub>H<sub>15</sub>Cl<sub>2</sub>N<sub>3</sub> + H]<sup>+</sup>: 344.07158; found: 344.07205.

## 2, 6-Bis (4-chlorophenyl)-*N,N*-dimethylpyrimidin-4-amine

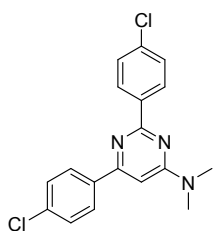

**<sup>1</sup>H NMR (300 MHz, Chloroform-*d*)** δ 8.49 (d, *J* = 8.6 Hz, 1H), 8.13 – 8.01 (m, 1H), 7.55 – 7.29 (m, 3H), 6.69 (s, 1H), 3.25 (s, 4H).

**<sup>13</sup>C NMR (75 MHz, Chloroform-*d*)** δ 163.37, 162.59, 161.90, 137.39, 137.13, 136.41, 136.18, 129.81, 129.01, 128.55, 96.09, 37.51.

**GC-MS (EI, 70ev):** *m/z*(%) = 314 (M+, 100), 345 (36), 344 (12), 343 (54), 330 (36), 328 (53), 318 (11), 317 (12), 316 (64), 315 (18), 265 (10), 164 (25), 163 (18), 162 (71), 140 (17), 139 (13), 138 (80), 137 (26), 136 (99), 127 (37), 126 (31), 111 (17), 103 (17), 102 (21), 101 (18), 100 (12), 76 (10), 75 (26), 68 (11), 55 (14), 44 (70), 42 (12).

**HRMS(ESI):** calcd. for [C<sub>18</sub>H<sub>15</sub>Cl<sub>2</sub>N<sub>3</sub> + H]<sup>+</sup>: 344.07158; found: 344.07169.

## 2, 6-Bis (2-chlorophenyl)-*N,N*-dimethylpyrimidin-4-amine

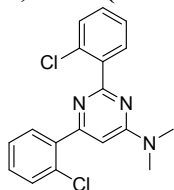

**<sup>1</sup>H NMR (300 MHz, Chloroform-*d*)** δ 7.98 – 7.71 (m, 1H), 7.73 – 7.58 (m, 1H), 7.55 – 7.35 (m, 2H), 7.35 – 7.16 (m, 4H), 6.68 (s, 1H), 3.13 (s, 7H).

**<sup>13</sup>C NMR (75 MHz, Chloroform-*d*)** δ 164.29, 162.36, 162.18, 138.84, 138.39, 132.81, 132.13, 131.79, 131.49, 130.47, 130.19, 129.99, 129.79, 127.06, 126.62, 101.04, 37.24.

**GC-MS (EI, 70ev):**  $m/z(\%) = 314 (M^+, 100), 345 (44), 344 (16), 343 (66), 330 (41), 329 (14), 328 (63), 318 (12), 317 (10), 316 (66), 315 (19), 205 (12), 164 (11), 163 (10), 162 (25), 140 (11), 138 (40), 137 (15), 136 (37), 127 (13), 126 (20), 102 (24), 101 (12), 100 (12), 75 (20), 44 (11), 42 (10).$

**HRMS(ESI):** calcd. for  $[C_{18}H_{15}Cl_2N_3 + H]^+$ : 344.07158; found: 344.07207.

## 2, 6-Bis (2-bromophenyl)-*N,N*-dimethylpyrimidin-4-amine

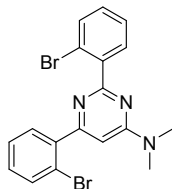

**$^1H$  NMR (300 MHz, Chloroform-*d*)**  $\delta$  7.86 (dd,  $J = 7.7, 1.8$  Hz, 1H), 7.74 – 7.66 (m, 3H), 7.42 (tdd,  $J = 7.5, 6.3, 1.3$  Hz, 2H), 7.33 – 7.19 (m, 2H), 6.72 (s, 1H), 3.25 (s, 6H).

**$^{13}C$  NMR (75 MHz, Chloroform-*d*)**  $\delta$  165.16, 163.94, 162.19, 140.78, 140.55, 133.74, 133.50, 131.87, 130.20, 130.00, 127.69, 127.32, 121.92, 121.68, 101.04, 37.43.

**GC-MS (EI, 70ev):**  $m/z(\%) = 404 (M^+, 100), 433 (64), 431 (33), 420 (26), 419 (10), 418 (52), 416 (27), 406 (50), 405 (19), 403 (11), 402 (53), 311 (12), 309 (12), 283 (13), 209 (14), 208 (29), 207 (15), 206 (28), 184 (30), 183 (11), 182 (69), 180 (39), 155 (10), 129 (19), 128 (20), 127 (60), 126 (20), 115 (12), 114 (11), 103 (14), 102(51), 101 (30), 100 (12), 76 (15), 75 (22), 44 (15).$

**HRMS(ESI):** calcd. for  $[C_{18}H_{15}Br_2N_3 + H]^+$ : 431.97055; found: 431.97089.

## 2, 6-Bis(4-bromophenyl)-*N,N*-dimethylpyrimidin-4-amine

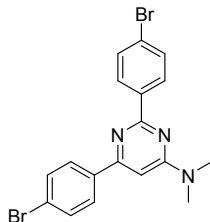

**$^1H$  NMR (300 MHz, Chloroform-*d*)**  $\delta$  8.41 (d,  $J = 8.6$  Hz, 2H), 8.11 – 7.89 (m, 2H), 7.80 – 7.47 (m, 4H), 6.67 (s, 1H), 3.22 (s, 6H).

**$^{13}C$  NMR (75 MHz, Chloroform-*d*)**  $\delta$  163.31, 162.61, 161.88, 137.85, 137.56, 131.94, 131.47, 130.06, 128.76, 124.92, 124.52, 96.05, 37.46.

**GC-MS (EI, 70ev):**  $m/z(\%) = 404 (M^+, 100), 433 (59), 431 (31), 420 (24), 418 (47), 416 (25), 406 (49), 405 (19), 403 (10), 402 (51), 309 (10), 216 (14), 209 (10), 208 (41), 207 (13), 206 (42), 184 (26), 183 (14), 182 (77), 181 (13), 180 (50), 155 (11), 128 (17), 127 (84), 126 (16), 103 (13), 102(32), 101 (39), 100 (13), 76 (18), 75 (23), 44 (46).$

**HRMS(ESI):** calcd. for  $[C_{18}H_{15}Br_2N_3 + H]^+$ : 431.97055; found: 431.97054.

## *N,N*-Dimethyl-2, 6-di (naphthalen-1-yl) pyrimidin-4-amine

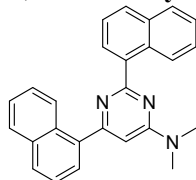

**$^1H$  NMR (300 MHz, Chloroform-*d*)**  $\delta$  9.02 – 8.84 (m, 1H), 8.38 – 8.28 (m, 1H), 8.17 (dd,  $J = 7.2, 1.3$  Hz, 1H), 7.91 (ddd,  $J = 9.2, 8.0, 2.5$  Hz, 4H), 7.73 (dd,  $J = 7.1, 1.3$  Hz, 1H), 7.65 – 7.40 (m, 7H), 6.71 (s, 1H), 3.26 (s, 6H).

**$^{13}C$  NMR (75 MHz, Chloroform-*d*)**  $\delta$  166.06, 165.63, 162.75, 138.31, 137.48, 134.29, 134.07, 131.55, 131.28, 129.90, 129.40, 129.04, 128.54, 128.47, 127.26, 126.74, 126.61, 126.30, 126.11, 125.98, 125.67, 125.45, 125.43, 101.07, 37.48.

**GC-MS (EI, 70ev):**  $m/z(\%) = 374 (M^+, 100), 376 (15), 375 (71), 360 (10), 152 (12), 151 (20).$

**HRMS(ESI):** calcd. for  $[C_{26}H_{21}N_3 + H]^+$ : 376.18082; found: 376.18102.

## 2, 6-Bis (3-bromophenyl)-*N, N*-dimethylpyrimidin-4-amine

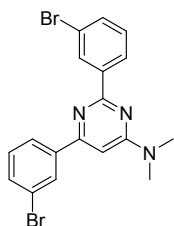

**$^1H$  NMR (300 MHz, Chloroform-*d*)**  $\delta$  8.67 (t,  $J = 1.8$  Hz, 1H), 8.49 (dt,  $J = 7.8, 1.3$  Hz, 1H), 8.25 (t,  $J = 1.8$  Hz, 1H), 8.05 (ddd,  $J = 7.8, 1.7, 1.0$  Hz, 1H), 7.59 (dddd,  $J = 7.9, 4.0, 2.0, 1.1$  Hz, 2H), 7.36 (td,  $J = 7.9, 6.6$  Hz, 2H), 6.70 (s, 1H), 3.26 (s, 7H).

**$^{13}C$  NMR (75 MHz, Chloroform-*d*)**  $\delta$  163.32, 162.23, 161.69, 141.00, 140.81, 133.22, 133.02, 131.41, 130.39, 130.25, 129.94, 127.08, 125.88, 123.09, 122.69, 96.72, 37.55.

**GC-MS (EI, 70ev):**  $m/z(\%) = 404$  (M+, 100), 435 (34), 434 (14), 433 (68), 431 (34), 420 (24), 419 (10), 418 (50), 416 (24), 406 (48), 405 (17), 402 (49), 208 (11), 206 (11), 184 (10), 182 (23), 180 (14), 127 (35), 102 (16), 101 (15), 76 (10), 75 (13), 44 (14).

**HRMS(ESI):** calcd. for  $[C_{18}H_{15}Br_2N_3 + H]^+$ : 431.97055; found: 431.9707.

## *N, N*-Dimethyl-2,6-bis(4-(trifluoromethyl)phenyl)pyrimidin-4-amine

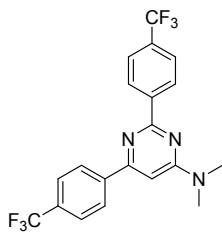

**$^1H$  NMR (300 MHz, Chloroform-*d*)**  $\delta$  8.64 (dp,  $J = 7.7, 0.9$  Hz, 1H), 8.20 (dq,  $J = 8.7, 0.9$  Hz, 1H), 7.87 – 7.62 (m, 2H), 6.72 (s, 0H), 3.22 (s, 3H).

**$^{13}C$  NMR (75 MHz, Chloroform-*d*)**  $\delta$  163.10, 162.09, 161.40, 141.99, 141.80, 131.70 (qd,  $J = 32.3, 3.6$  Hz), 129.66 (d,  $J = 16.4$  Hz), 128.50, 127.33, 126.05 (d,  $J = 16.6$  Hz), 125.56 (q,  $J = 3.8$  Hz), 125.06 (p,  $J = 3.4, 2.9$  Hz), 122.44 (d,  $J = 16.4$  Hz), 118.84 (d,  $J = 16.4$  Hz), 96.97, 37.25.

**GC-MS (EI, 70ev):**  $m/z(\%) = 382$  (M+, 100), 412 (16), 411 (69), 397 (14), 396 (67), 392 (14), 383 (20), 196 (17), 176 (15), 172 (18), 170 (27), 44 (13).

**HRMS(ESI):** calcd. for  $[C_{20}H_{15}F_6N_3 + H]^+$ : 412.12429; found: 412.12452.

## *N, N*-Dimethyl-2, 6-bis(4-phenoxyphenyl)pyrimidin-4-amine

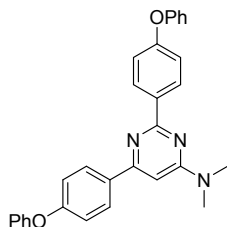

**$^1H$  NMR (300 MHz, Chloroform-*d*)**  $\delta$  8.63 – 8.49 (m, 2H), 8.22 – 8.07 (m, 2H), 7.47 – 7.33 (m, 4H), 7.20 – 7.01 (m, 5H), 6.68 (s, 1H), 3.24 (s, 3H).

**$^{13}C$  NMR (75 MHz, Chloroform-*d*)**  $\delta$  163.35, 162.92, 162.36, 159.22, 159.10, 157.17, 156.97, 134.23, 133.80, 130.14, 130.01, 129.94, 128.82, 123.80, 123.59, 119.39, 119.30, 118.75, 118.41, 95.24, 37.36.

**GC-MS (EI, 70ev):**  $m/z(\%) = 430$  (M+, 100), 460 (21), 459 (67), 445 (16), 444 (43), 431 (31), 220 (16), 196 (11), 194 (12), 77 (21).

**HRMS(ESI):** calcd. for  $[C_{30}H_{25}N_3O_2 + H]^+$ : 460.20195; found: 460.20216.

### 7-Methyl-2, 4-diphenyl-6, 7-dihydro-5H-pyrrolo[2,3-*d*]pyrimidine

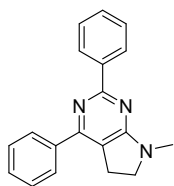

**<sup>1</sup>H NMR (300 MHz, Chloroform-*d*)** δ 8.65 – 8.36 (m, 1H), 8.17 – 7.94 (m, 1H), 7.59 – 7.38 (m, 3H), 3.78 – 3.56 (m, 1H), 3.43 – 3.23 (m, 1H), 3.12 (s, 2H).

**<sup>13</sup>C NMR (75 MHz, Chloroform-*d*)** δ 169.04 , 163.45 , 154.48 , 138.97 , 138.45 , 130.01 , 129.34 , 128.61 , 128.31 , 114.12 , 51.45 , 31.64 , 26.31 .

**GC-MS (EI, 70ev):** m/z(%) = 286 (M<sup>+</sup>, 100), 287 (55).

**HRMS(ESI):** calcd. for [C<sub>19</sub>H<sub>17</sub>N<sub>3</sub> + H]<sup>+</sup>: 288.14952; found: 288.14962.

### *N, N*-Diethyl-2,6-diphenylpyrimidin-4-amine

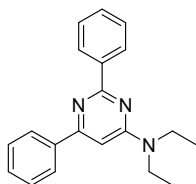

**<sup>1</sup>H NMR (300 MHz, Chloroform-*d*)** δ 8.72 – 8.60 (m, 1H), 8.29 – 8.05 (m, 1H), 7.67 – 7.41 (m, 3H), 6.75 (s, 0H), 3.70 (q, *J* = 7.3 Hz, 4H), 1.32 (t, *J* = 7.1 Hz, 6H).

**<sup>13</sup>C NMR (75 MHz, Chloroform-*d*)** δ 163.62 , 163.04 , 161.84 , 139.26 , 139.14 , 130.05 , 129.82 , 128.71 , 128.35 , 128.24 , 127.18 , 96.12 , 42.56 , 13.10 .

**GC-MS (EI, 70ev):** m/z(%) = 274 (M<sup>+</sup>, 100), 304 (16), 302 (12), 288 (16), 275 (42), 261 (12), 260 (71), 129 (10), 128 (56), 104 (31), 103 (11), 102 (31), 101 (11), 77 (24), 29 (15).

**HRMS(ESI):** calcd. for [C<sub>20</sub>H<sub>21</sub>N<sub>3</sub> + H]<sup>+</sup>: 304.18082; found: 304.1812.

### 4-(2,6-Diphenylpyrimidin-4-yl)morpholine

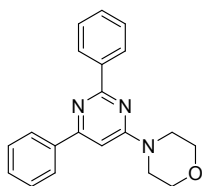

**<sup>1</sup>H NMR (300 MHz, Chloroform-*d*)** δ 8.82 – 8.39 (m, 2H), 8.23 – 7.98 (m, 2H), 7.64 – 7.37 (m, 6H), 3.94 – 3.67 (m, 4H), 6.81 (s, 0H), 3.89 – 3.82 (m, 2H), 3.79 (dd, *J* = 5.7, 3.4 Hz, 2H).

**<sup>13</sup>C NMR (75 MHz, Chloroform-*d*)** δ 163.88 , 163.72 , 163.46 , 138.71 , 138.59 , 130.41 , 130.22 , 128.82 , 128.42 , 128.37 , 127.24 , 96.52 , 66.79 , 44.50 .

**GC-MS (EI, 70ev):** m/z(%) = 286 (M<sup>+</sup>, 100), 318 (14), 317 (66), 316 (21), 287 (37), 272 (23), 261 (14), 260 (68), 259 (25), 232 (17), 231 (11), 129 (14), 128 (41), 104 (33), 103 (22), 102 (53), 101 (14), 77 (29), 76 (13).

**HRMS(ESI):** calcd. for [C<sub>20</sub>H<sub>19</sub>N<sub>3</sub>O + H]<sup>+</sup>: 318.16009; found: 318.16032.

### *N, N*, 5-Trimethyl-2,6-diphenylpyrimidin-4-amine

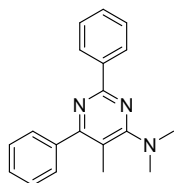

**<sup>1</sup>H NMR (300 MHz, Chloroform-*d*)**  $\delta$  8.64 – 8.31 (m, 2H), 7.77 – 7.64 (m, 2H), 7.57 – 7.35 (m, 6H), 3.17 (s, 6H), 2.26 (s, 3H).

**<sup>13</sup>C NMR (75 MHz, Chloroform-*d*)**  $\delta$  167.45, 165.73, 160.07, 139.91, 138.62, 130.03, 129.99, 129.02, 128.36, 128.30, 128.22, 130.53 – 129.76 (m), 111.90, 41.06, 18.21.

**GC-MS (EI, 70ev):**  $m/z(\%)$  = 288 (M+, 100), 289 (53), 274 (20), 260 (13), 245 (12), 116 (24), 104 (12), 103 (14), 77 (12).

**HRMS(ESI):** calcd. for [C<sub>19</sub>H<sub>19</sub>N<sub>3</sub> + H]<sup>+</sup>: 290.16517; found: 290.16539.

### 7-Ethyl-2,4-diphenyl-6,7-dihydro-5H-pyrrolo[2,3-*d*]pyrimidine

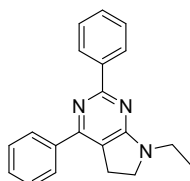

**<sup>1</sup>H NMR (300 MHz, Chloroform-*d*)**  $\delta$  8.67 – 8.31 (m, 1H), 8.23 – 7.91 (m, 1H), 7.67 – 7.35 (m, 3H), 3.82 – 3.47 (m, 2H), 3.32 (dd,  $J$  = 8.8, 7.7 Hz, 1H), 1.27 (t,  $J$  = 7.2 Hz, 2H).

**<sup>13</sup>C NMR (75 MHz, Chloroform-*d*)**  $\delta$  168.51, 163.37, 154.41, 138.95, 138.42, 129.99, 129.31, 128.60, 128.30, 114.38, 48.39, 39.18, 26.16, 12.55.

**GC-MS (EI, 70ev):**  $m/z(\%)$  = 301 (M+, 100), 302 (21), 300 (72), 299 (18), 287 (19), 286 (83), 104 (12), 273 (42), 272 (60), 271 (20), 140 (24), 128 (15), 127 (13), 116 (13), 115 (21), 104 (19), 103 (12), 77 (20).

### 7-Benzyl-2,4-diphenyl-6,7-dihydro-5H-pyrrolo[2,3-*d*]pyrimidine

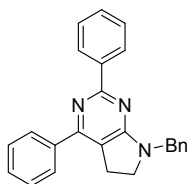

**<sup>1</sup>H NMR (300 MHz, Chloroform-*d*)**  $\delta$  8.69 – 8.55 (m, 2H), 8.04 (d,  $J$  = 7.4 Hz, 2H), 7.60 – 7.28 (m, 12H), 4.79 (s, 2H), 3.56 (t,  $J$  = 8.1 Hz, 2H), 3.30 (t,  $J$  = 8.2 Hz, 2H).

**<sup>13</sup>C NMR (75 MHz, Chloroform-*d*)**  $\delta$  168.67, 163.33, 155.01, 138.96, 138.46, 137.45, 130.04, 129.36, 128.85, 128.61, 128.54, 128.47 – 128.20 (m), 128.29, 127.69, 114.00, 48.56, 48.44, 26.18.

**GC-MS (EI, 70ev):**  $m/z(\%)$  = 91 (M+, 100), 364 (24), 363 (98), 362 (93), 361 (14), 360 (13), 286 (23), 284 (14), 272 (27), 259 (22), 182 (23), 140 (23), 128 (11), 115 (26), 104 (11), 77 (15), 65 (20).

### 8-Methyl-2,4-diphenyl-5,6,7,8-tetrahydropyrido[2,3-*d*]pyrimidine

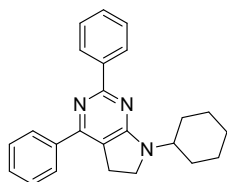

**<sup>1</sup>H NMR (300 MHz, Chloroform-*d*)**  $\delta$  8.88 – 8.24 (m, 2H), 8.16 – 7.81 (m, 2H), 7.60 – 7.30 (m, 6H), 4.41 – 4.04 (m, 1H), 3.65 (dd,  $J$  = 8.9, 7.7 Hz, 2H), 3.27 (dd,  $J$  = 8.9, 7.7 Hz, 2H), 1.95 – 1.81 (m, 4H), 1.81 – 1.68 (m, 1H), 1.51 (td,  $J$  = 9.2, 3.9 Hz, 4H), 1.29 – 1.06 (m, 1H).

**<sup>13</sup>C NMR (75 MHz, Chloroform-*d*)**  $\delta$  167.97, 163.24, 154.21, 139.22, 138.66, 129.84, 129.14, 128.53, 128.27, 128.24, 128.20, 114.62, 52.36, 44.45, 29.93, 25.92.

**GC-MS (EI, 70ev):**  $m/z(\%)$  = 273 (M+, 100), 355 (35), 298 (11), 274 (22).



**(Z)-1-Cyclopropyl-3-imino-3-phenylprop-1-en-1-ol**

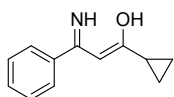

**<sup>1</sup>H NMR (300 MHz, Chloroform-*d*)**  $\delta$  9.84 (s, 1H), 7.72 – 7.51 (m, 2H), 7.50 – 7.33 (m, 3H), 5.58 (s, 1H), 5.23 (s, 1H), 1.81 (tt,  $J = 7.9, 4.6$  Hz, 1H), 1.12 – 0.95 (m, 2H), 0.92 – 0.54 (m, 2H).

**<sup>13</sup>C NMR (75 MHz, Chloroform-*d*)**  $\delta$  199.39 , 160.24 , 137.60 , 130.59 , 129.05 , 126.44 , 95.12 , 21.01 , 9.61 .

**GC-MS (EI, 70ev):**  $m/z(\%) = 146 (M^+, 100), 187 (52), 186 (40), 152 (14), 147 (12), 137 (20), 117 (16), 104 (30), 103 (36), 91(36), 77(30), 69(24), 51(20), 41(40), 39(46).$

150729.330.10.fid  
Jian-Bo Feng F11a-5  
Au1H CDCl3 /opt/topspin 1507 30

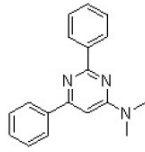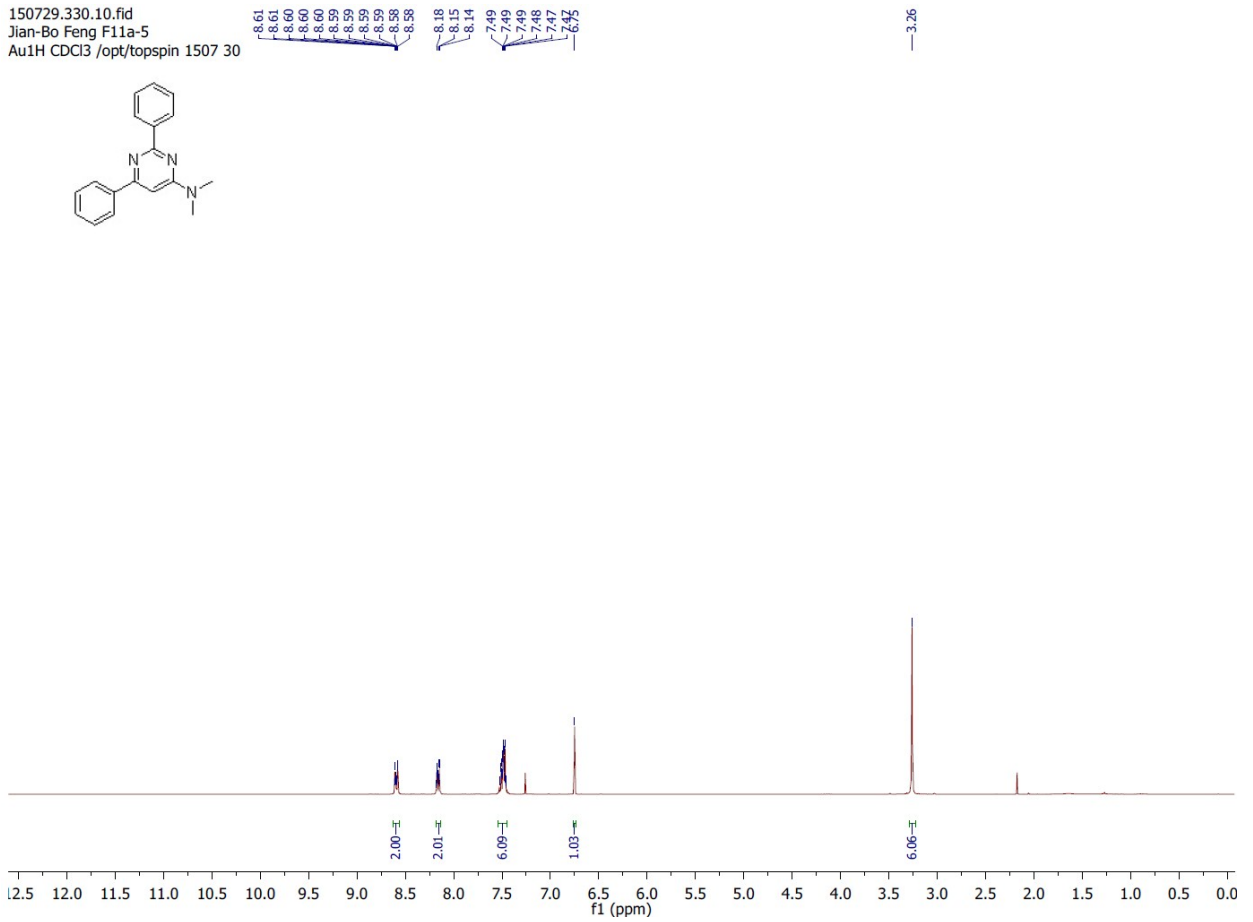

150729.330.11.fid  
Jian-Bo Feng F11a-5  
Au13C CDCl3 /opt/topspin 1507 30

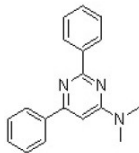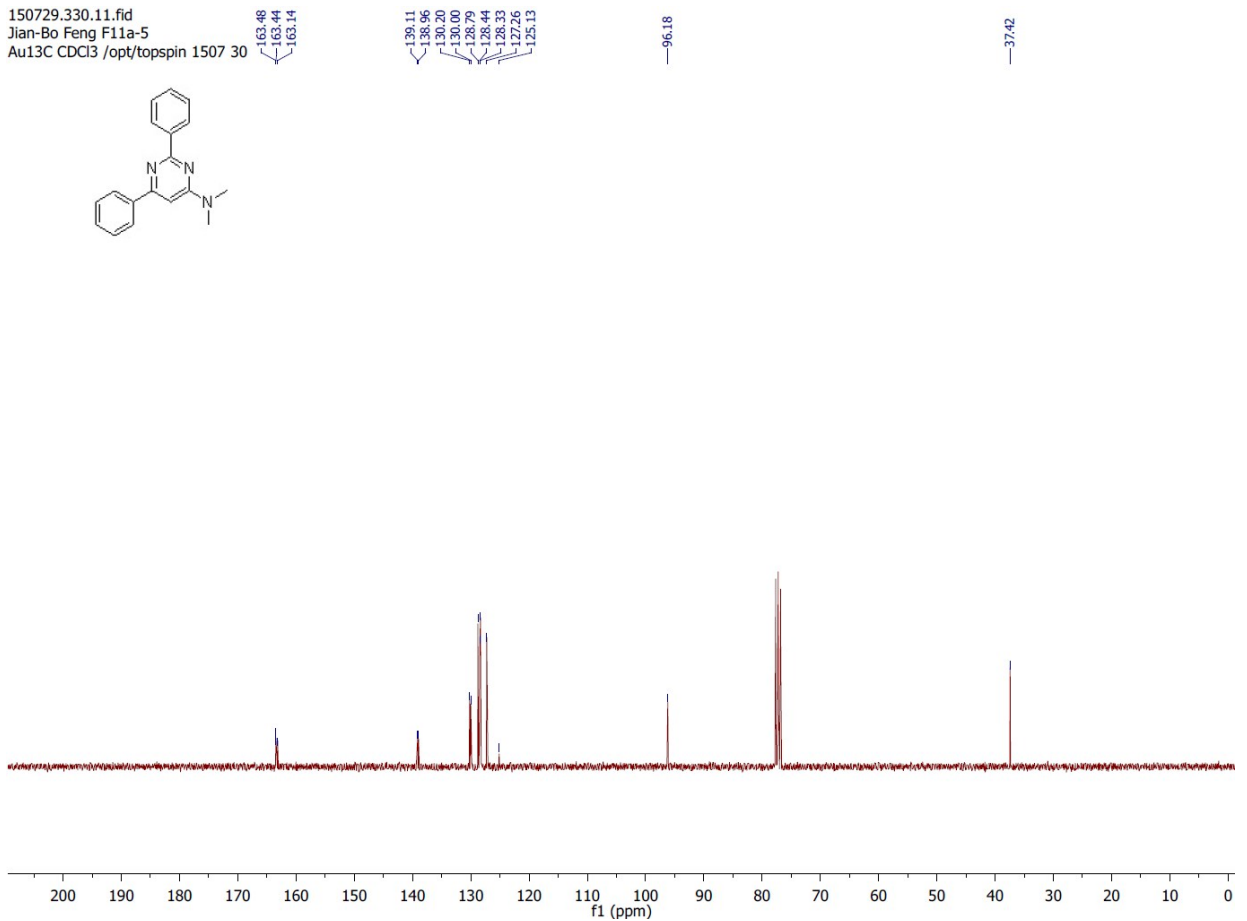

150911.f311.10.fid  
Jian-Bo Feng 39a171-1  
PROTON CDCl3 {C:\Bruker\TopSpin3.2PL6} 1509 11

8.43  
8.40  
8.02  
7.99  
7.26  
7.24  
7.23  
7.23  
6.65

3.20  
2.38

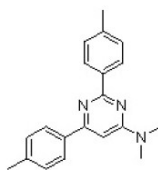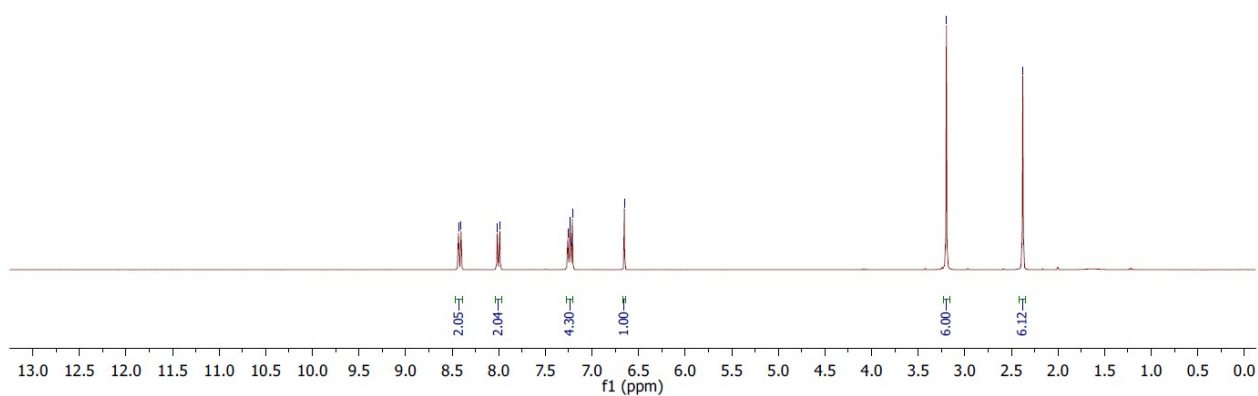

150911.f311.11.fid  
Jian-Bo Feng 39a171-1  
C13CPD CDCl3 {C:\Bruker\TopSpin3.2PL6} 1509 11

163.49  
163.44  
163.05

140.18  
140.07  
136.47  
136.20  
129.48  
129.07  
128.41  
127.16

95.54

37.40

21.70  
21.60

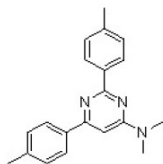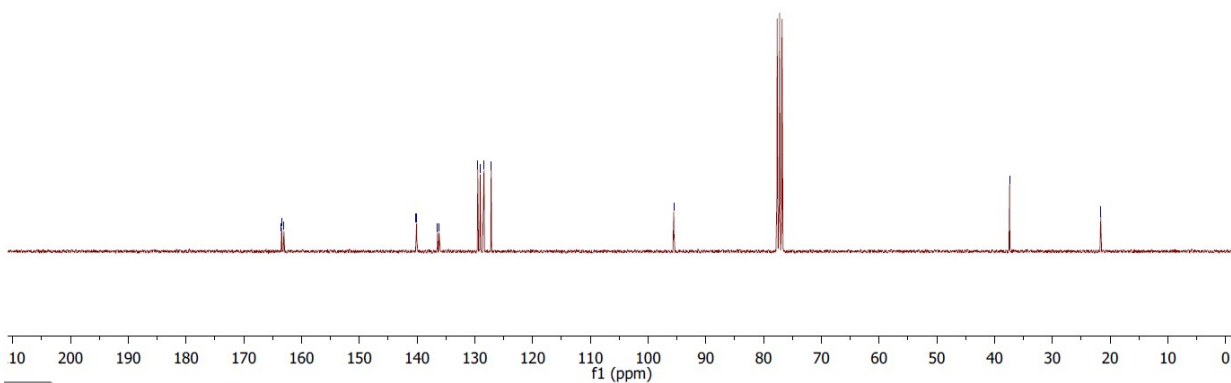

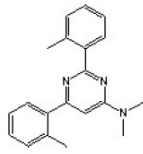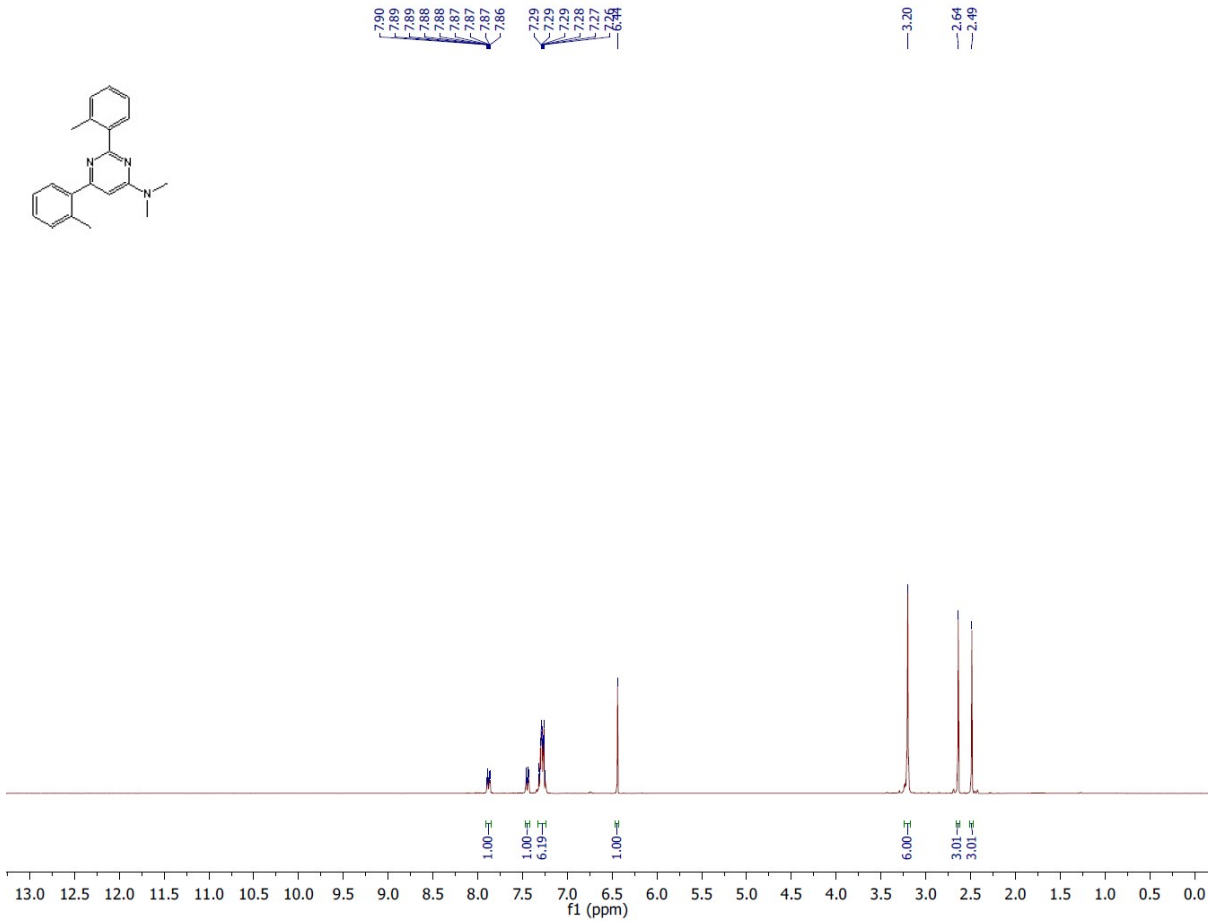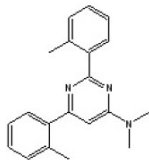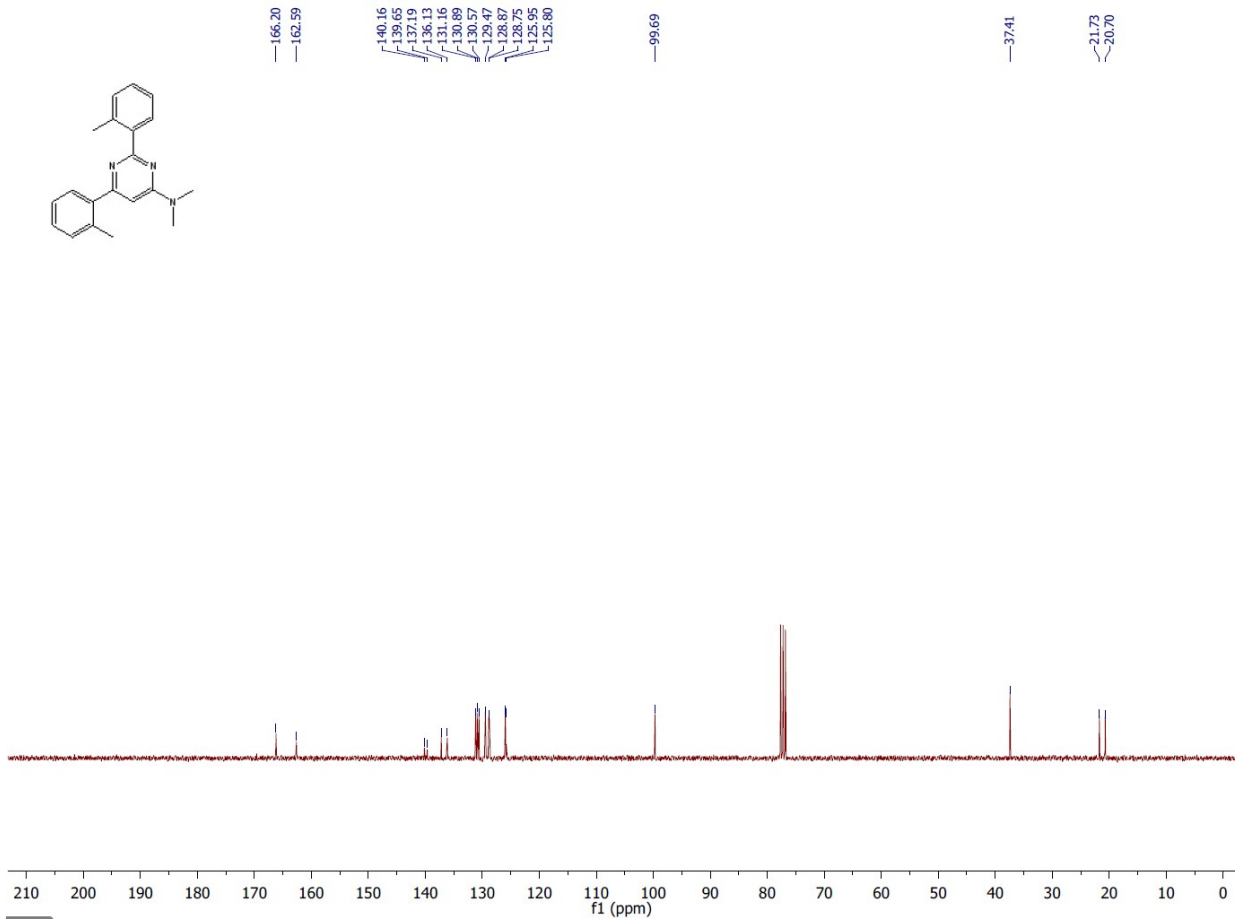

150914.301.10.fid  
Jian-Bo Feng 39a173-7  
Au1H CDCl3 /opt/topspin 1509 1

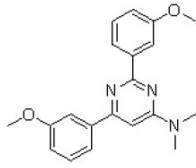

8.21  
8.21  
8.19  
8.18  
8.18  
8.17  
8.16  
8.16  
7.76  
7.43  
7.40  
7.40  
7.38  
7.04  
7.03  
7.02  
7.01  
7.01  
7.00  
6.72

3.92  
3.92  
3.23

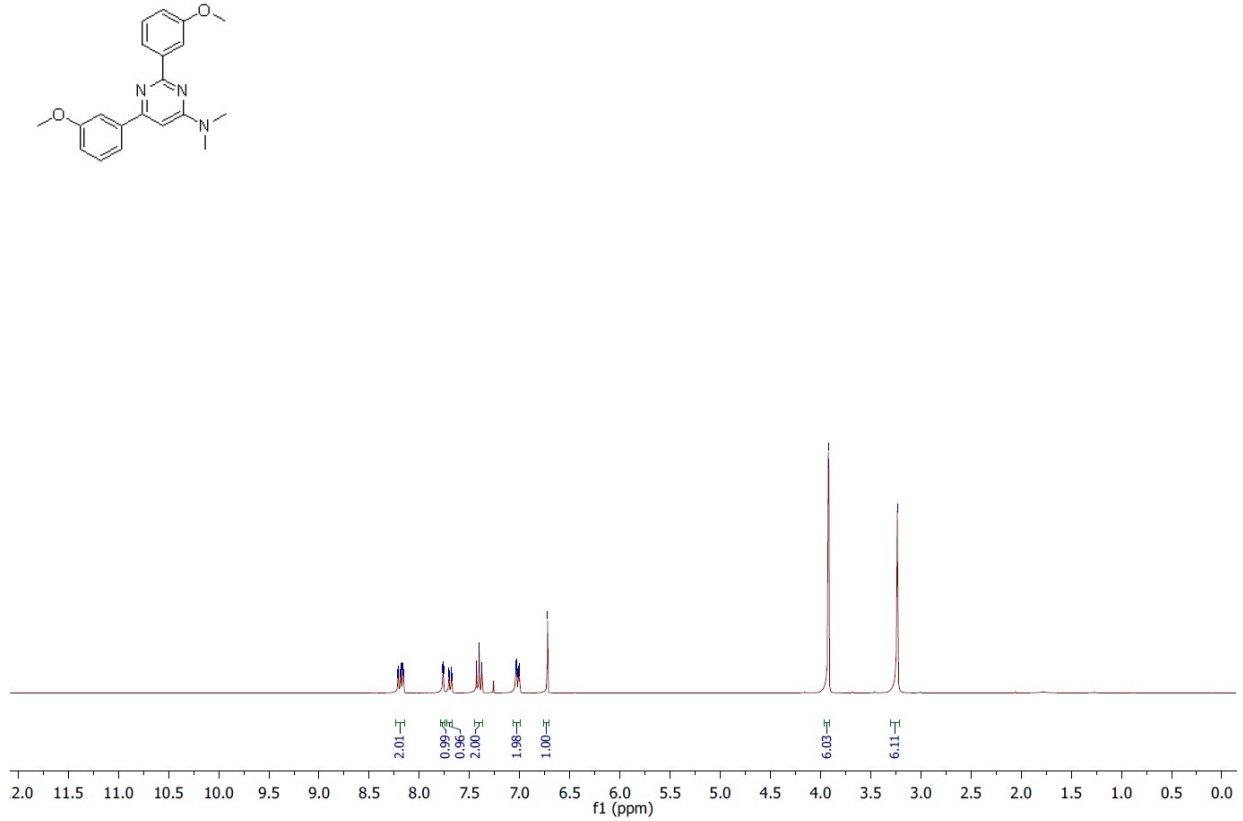

150914.301.11.fid  
Jian-Bo Feng 39a173-7  
Au13C CDCl3 /opt/topspin 1509 1

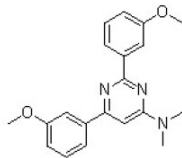

163.34  
163.14  
162.79  
160.07  
159.78  
140.60  
140.39  
129.73  
129.28  
121.03  
119.59  
116.04  
115.51  
113.59  
112.87

96.41

55.57  
55.50

37.37

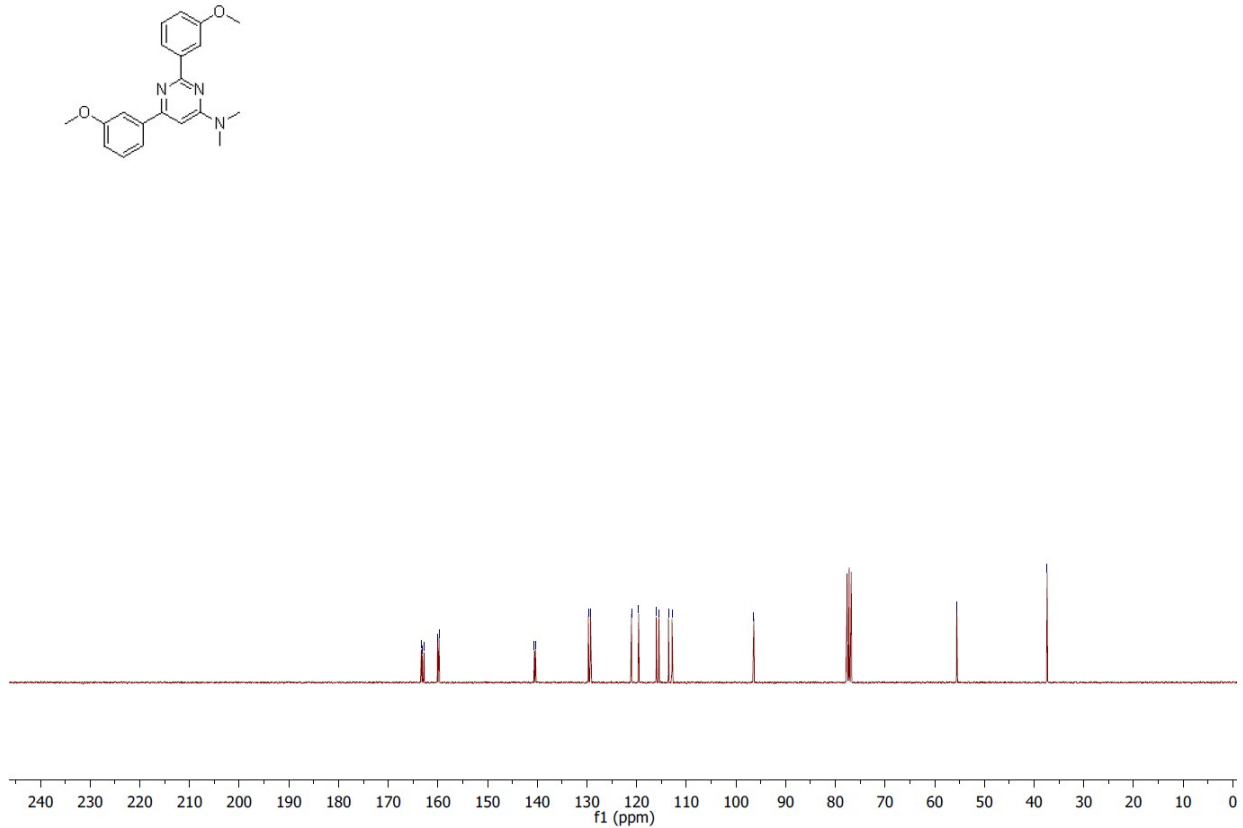

150925.318.10.fid  
Jian-Bo Feng 39a193-1  
Au1H CDCl3 /opt/topspin 1509 18

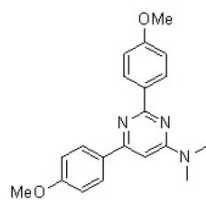

8.56  
8.55  
8.54  
8.54  
8.54  
8.53  
8.52  
8.51  
8.13  
8.12  
8.11  
8.10  
7.02  
7.01  
7.01  
6.99  
6.98

3.88  
3.87  
3.22

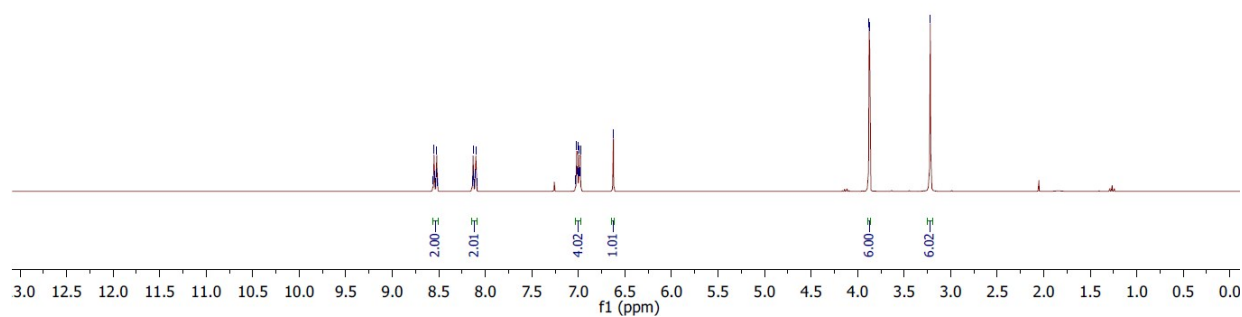

150925.318.11.fid  
Jian-Bo Feng 39a193-1  
Au13C CDCl3 /opt/topspin 1509 18

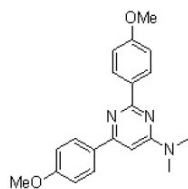

163.34  
163.05  
162.49  
161.44  
161.24

131.95  
131.49  
129.93  
128.57

114.04  
113.57

94.54

55.54  
55.50

37.23

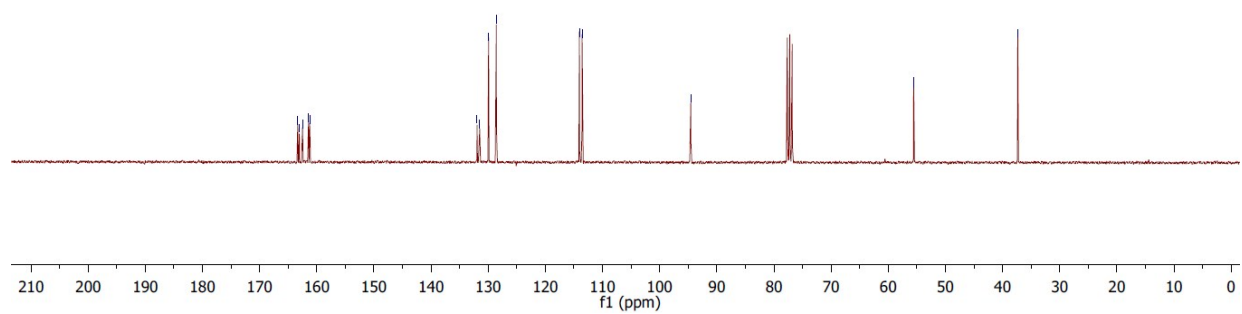

150915.f321.10.fid  
Jian-Bo Feng 39a176-1-2  
PROTON CDCl3 {C:\Bruker\TopSpin3.2PL6} 1509 21

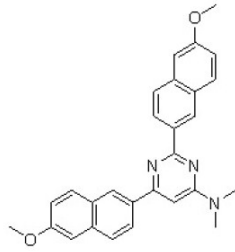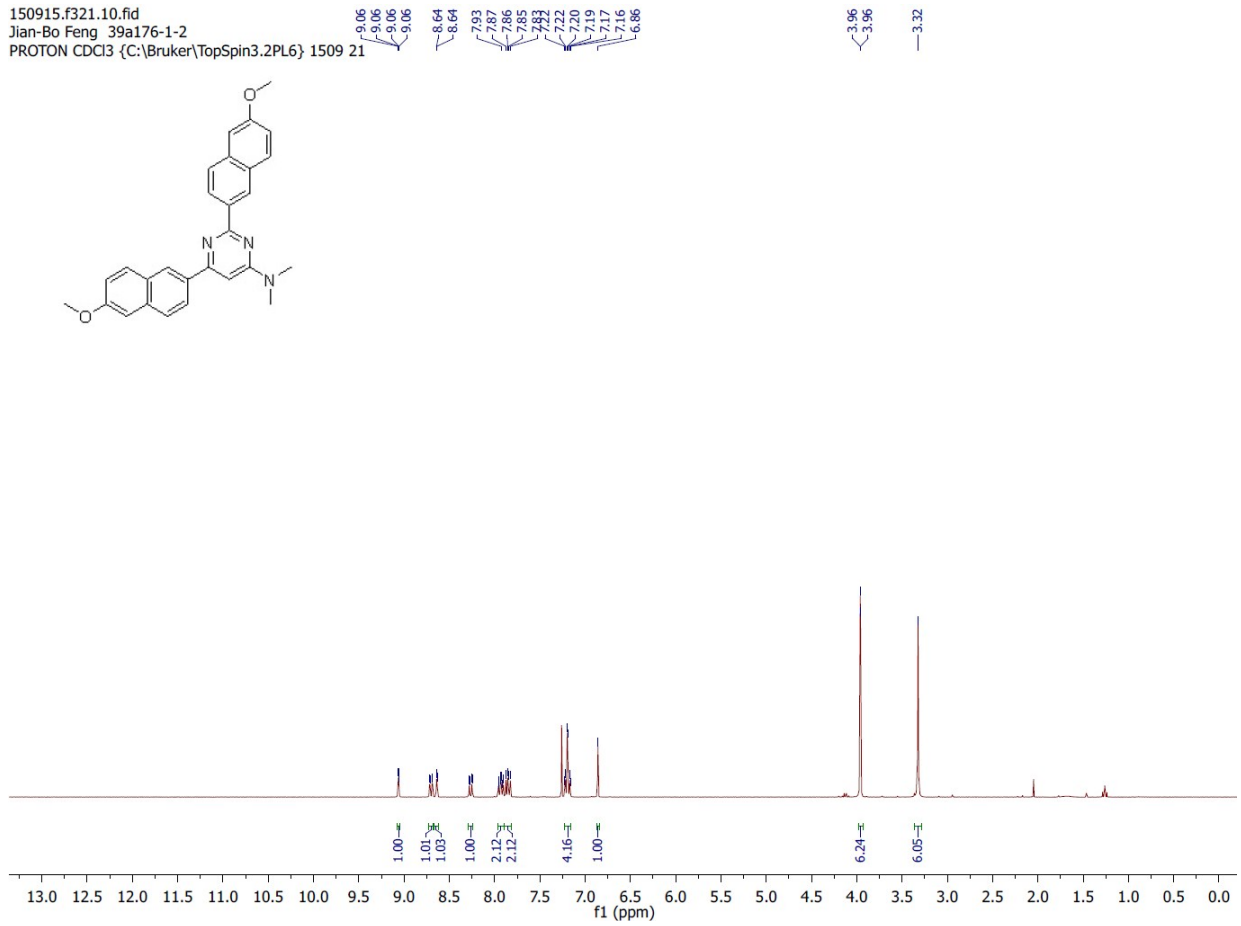

150915.f321.11.fid  
Jian-Bo Feng 39a176-1-2  
C13CPD CDCl3 {C:\Bruker\TopSpin3.2PL6} 1509 21

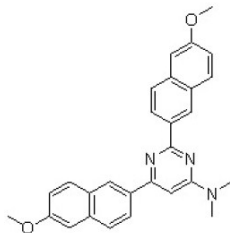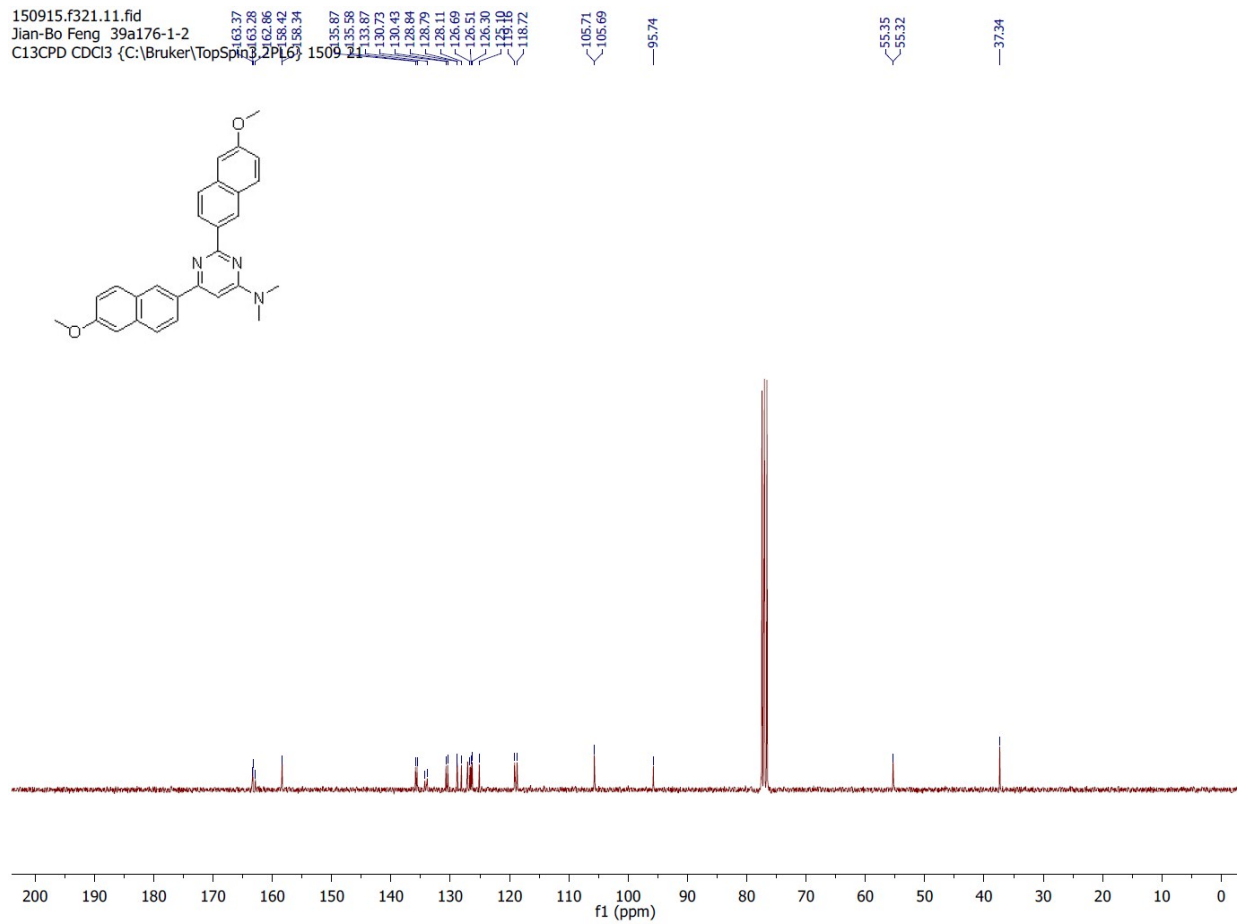

150916.308.10.fid  
Jian-Bo Feng 39a176-7  
Au1H CDCl3 /opt/topspin 1509 8

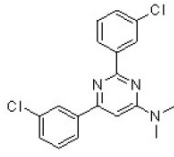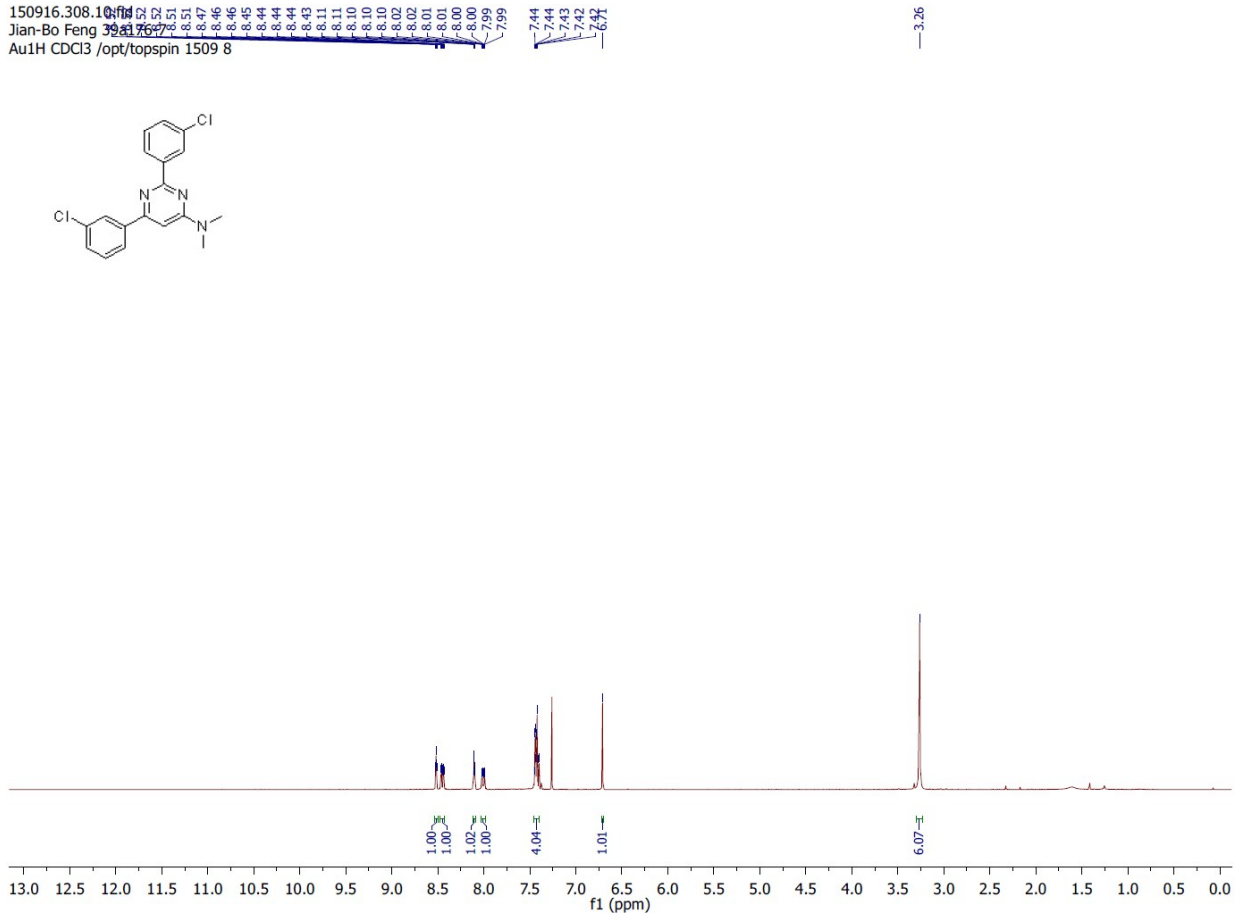

150916.308.11.fid  
Jian-Bo Feng 39a176-7  
Au13C CDCl3 /opt/topspin 1509 8

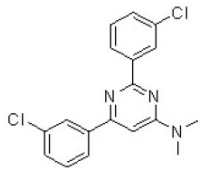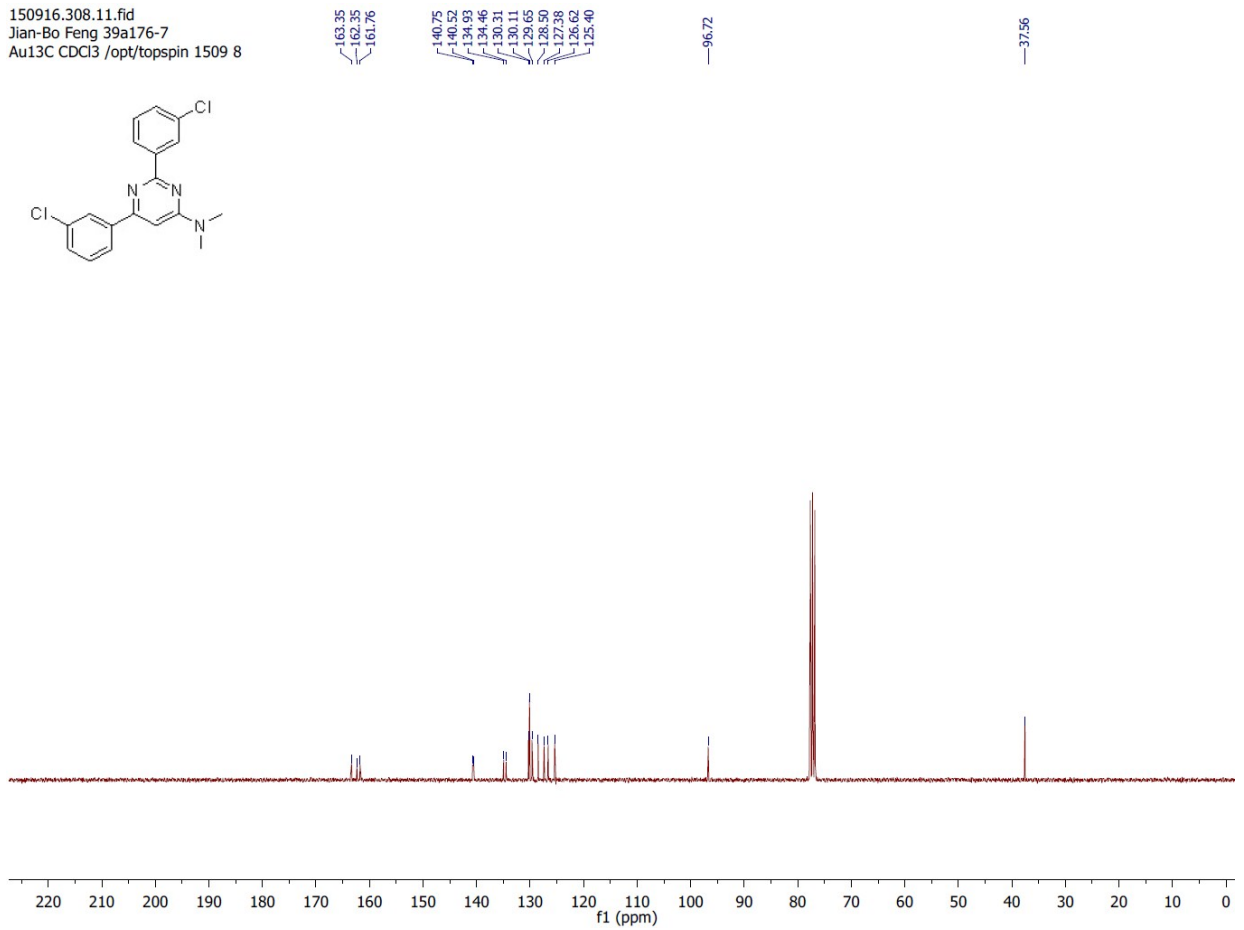



150916.309.10.fid  
Jian-Bo Feng 39a176-8  
Au1H CDCl3 /opt/topspin 1509 9

8.50  
8.47  
8.08  
8.06  
7.47  
7.45  
7.44  
7.42  
7.41  
6.89

3.25

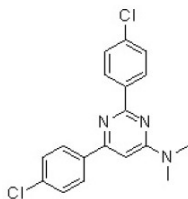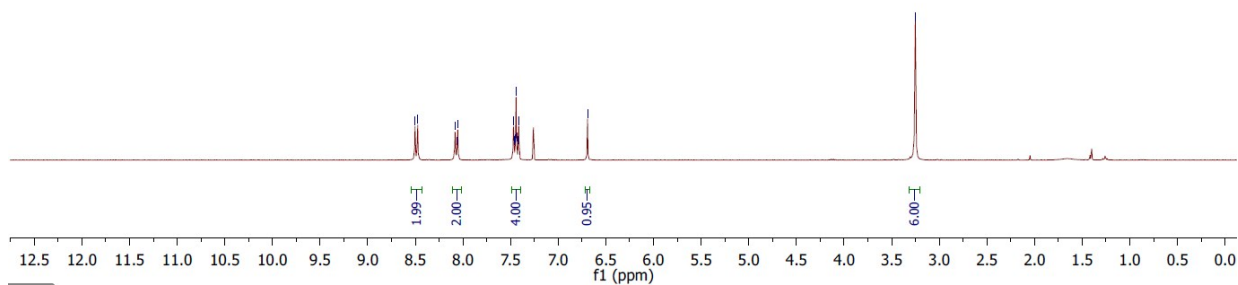

150916.309.11.fid  
Jian-Bo Feng 39a176-8  
Au13C CDCl3 /opt/topspin 1509 9

163.37  
162.59  
161.90

137.39  
137.13  
136.41  
136.18  
129.81  
129.01  
128.55

96.09

37.51

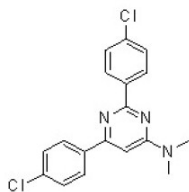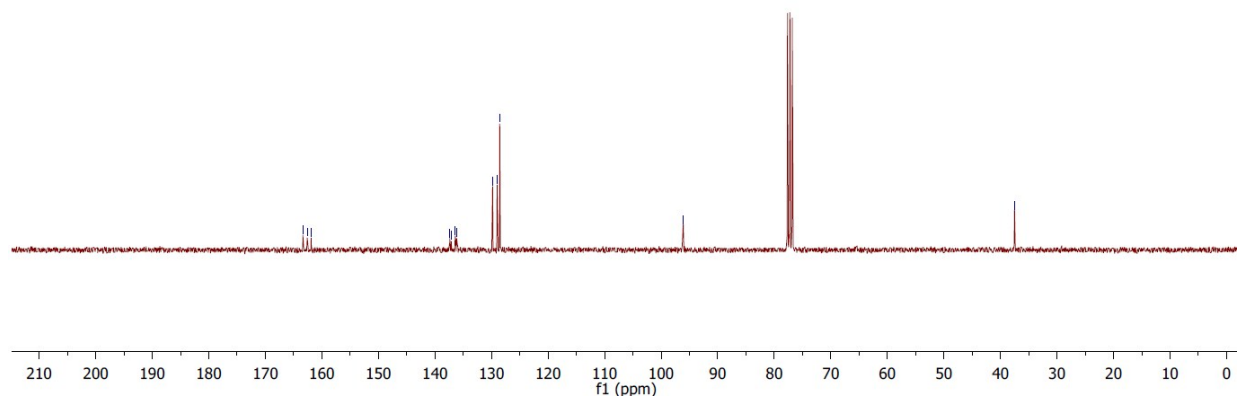

150916.307.10.fid  
Jian-Bo Feng 39a179-3  
Au1H CDCl3 /opt/topspin 1509 7

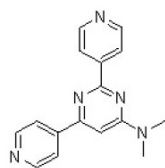

8.76  
8.75  
8.74  
8.74  
8.73  
8.72  
8.35  
8.33  
7.97  
7.96  
7.95

6.81

3.25

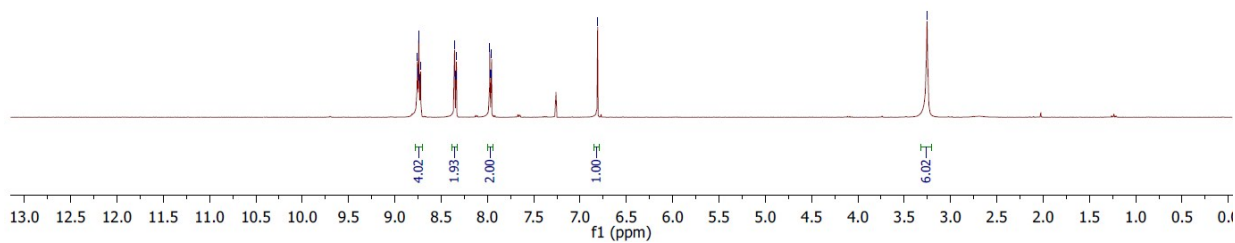

150916.307.11.fid  
Jian-Bo Feng 39a179-3  
Au13C CDCl3 /opt/topspin 1509 7

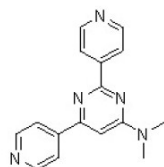

163.34  
161.83  
160.68

150.61  
150.25  
146.04  
145.62

122.34  
121.24

97.99

37.53

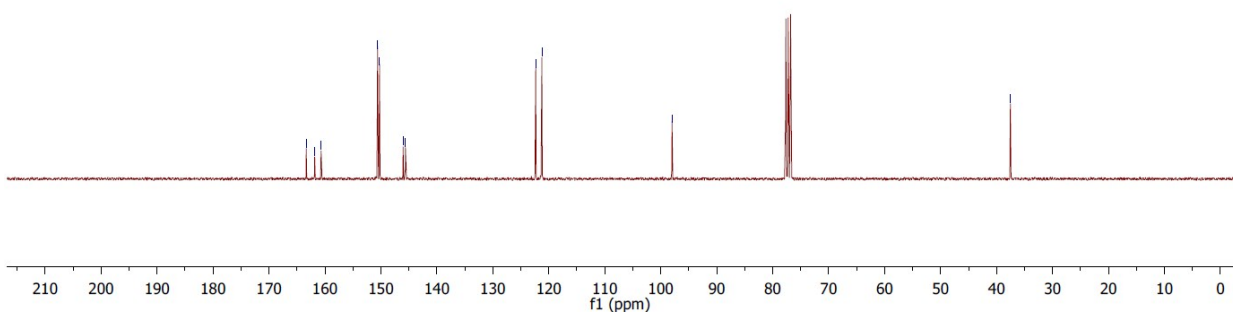

150916.304.10.fid  
Jian-Bo Feng 39a179-4  
Au1H CDCl3 /opt/topspin 1509 4

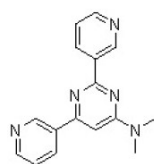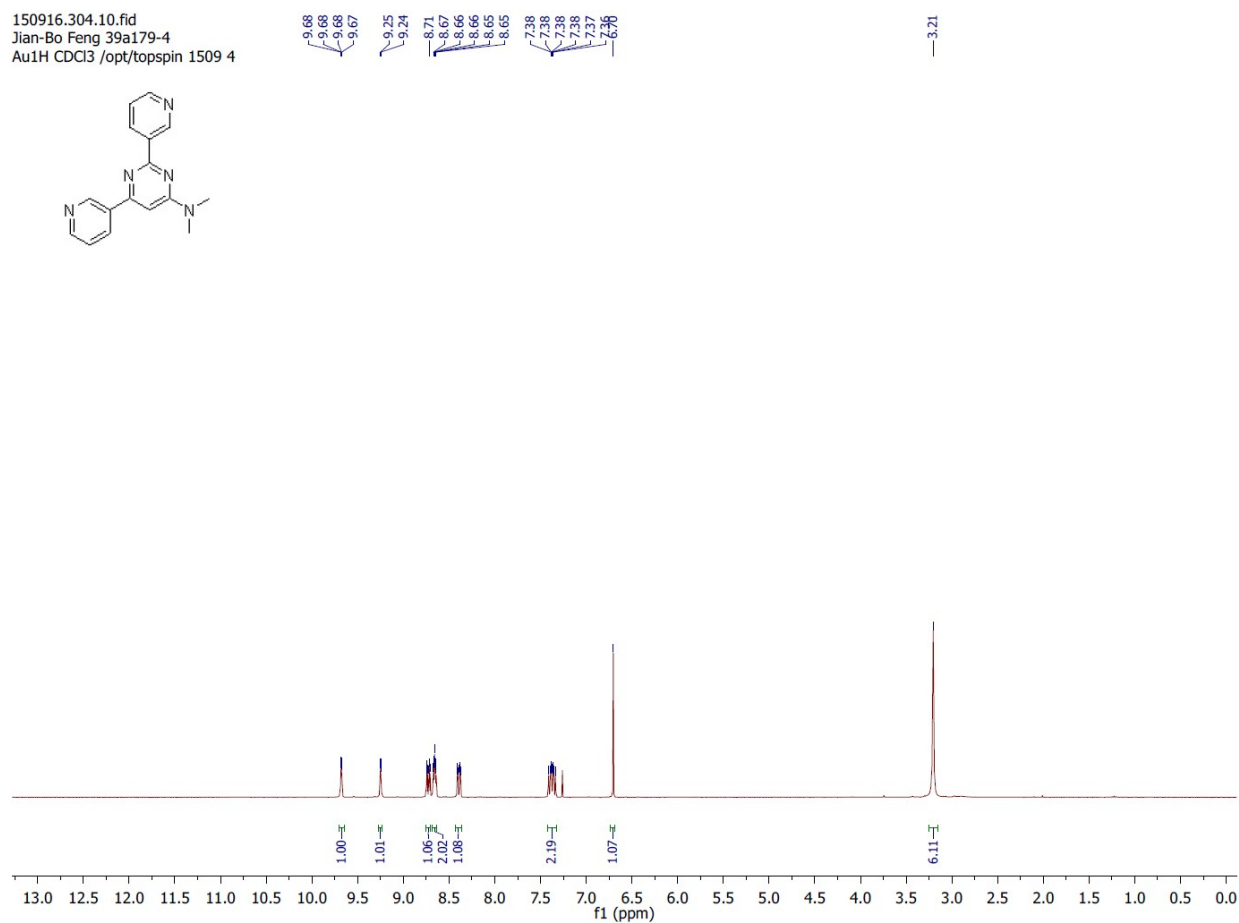

150916.304.11.fid  
Jian-Bo Feng 39a179-4  
Au13C CDCl3 /opt/topspin 1509 4

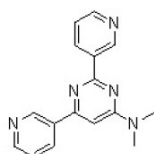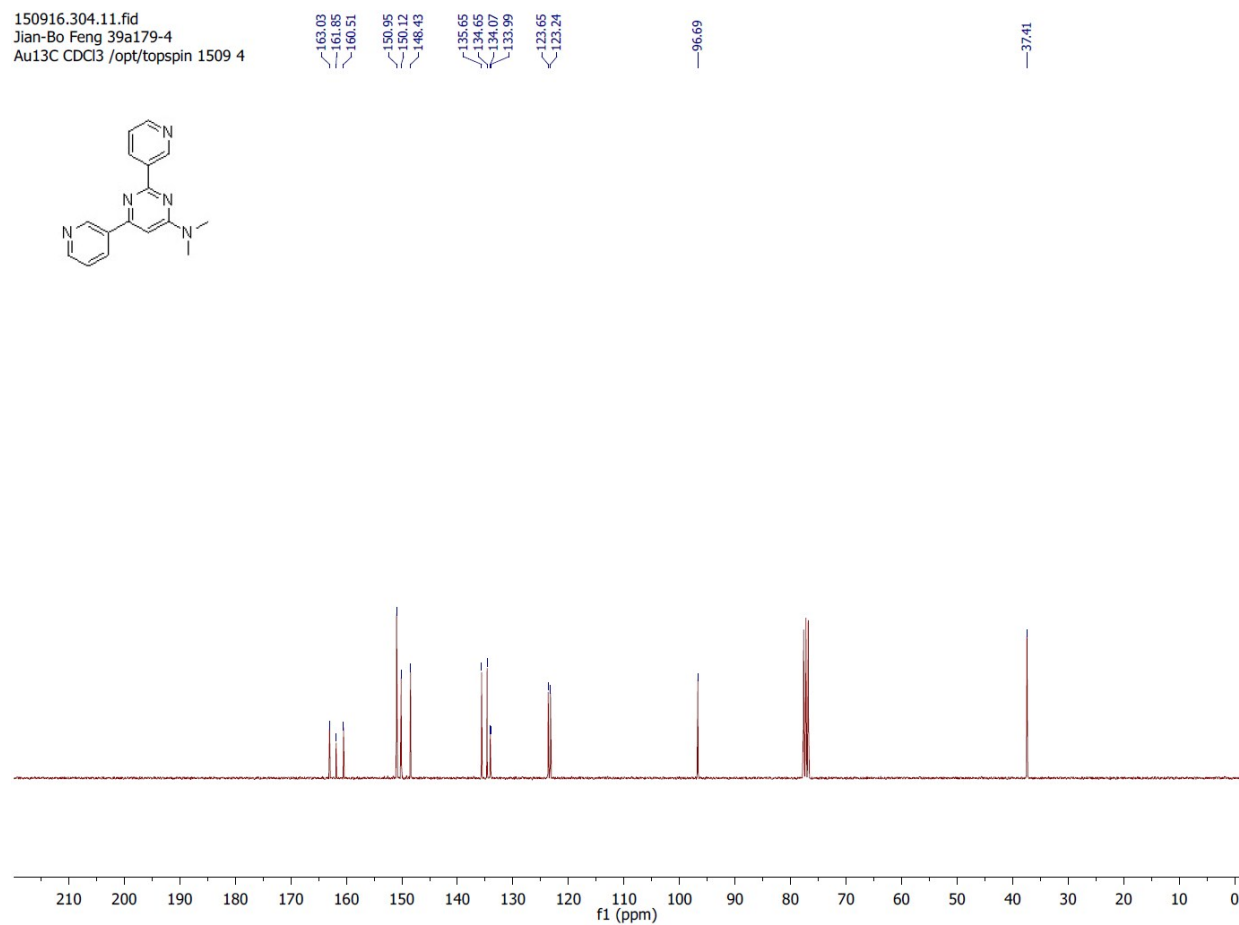

150917.314.10.fid  
Jian-Bo Feng 39a183-1  
Au1H CDCl3 /opt/topspin 1509 14

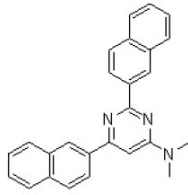

9.15  
9.15  
9.15  
9.14  
8.74  
8.71  
8.00  
7.98  
7.67  
7.56  
7.55  
7.54  
7.53  
7.51

3.32

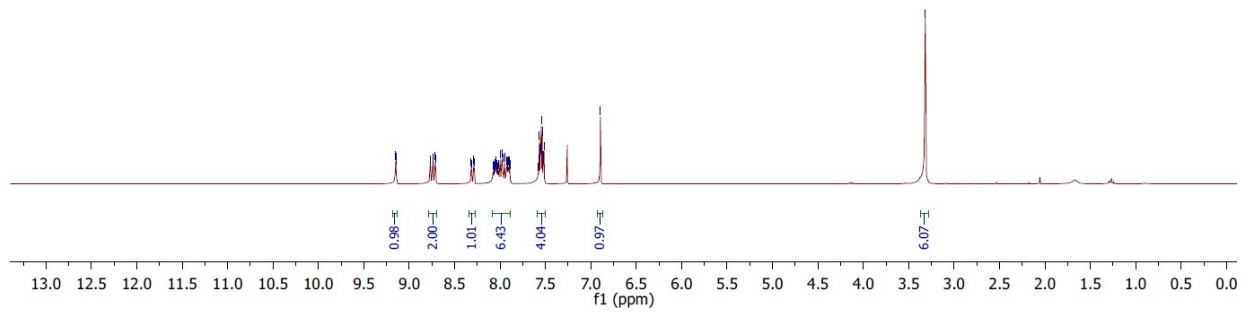

150917.314.11.fid  
Jian-Bo Feng 39a183-1  
Au13C CDCl3 /opt/topspin 1509 14

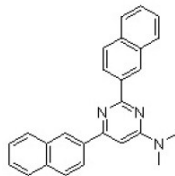

163.47  
163.06

136.56  
136.36  
134.75  
134.43  
133.57  
133.53  
129.40  
128.49  
128.44  
127.91  
127.88  
127.04  
126.95  
126.79  
126.49  
126.08  
125.91  
124.75

96.58

37.53

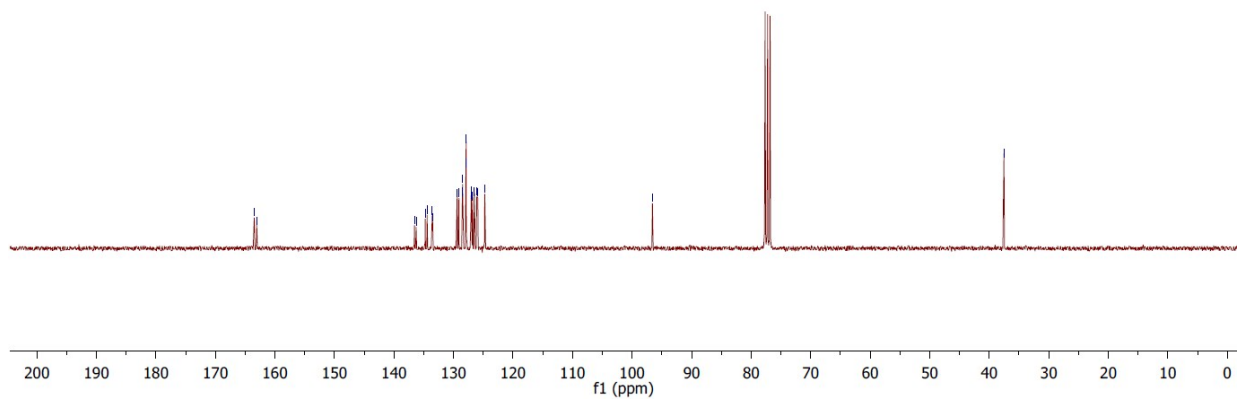

150917.312.10.fid  
Jian-Bo Feng 39a183-12  
Au1H CDCl3 /opt/topspin 1509 12

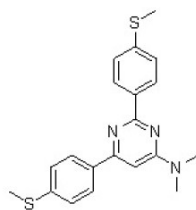

8.50  
8.49  
8.46  
8.47  
8.08  
8.06  
7.95  
7.34  
7.34  
7.33  
7.32  
7.31  
6.65  
3.21  
2.54  
2.53

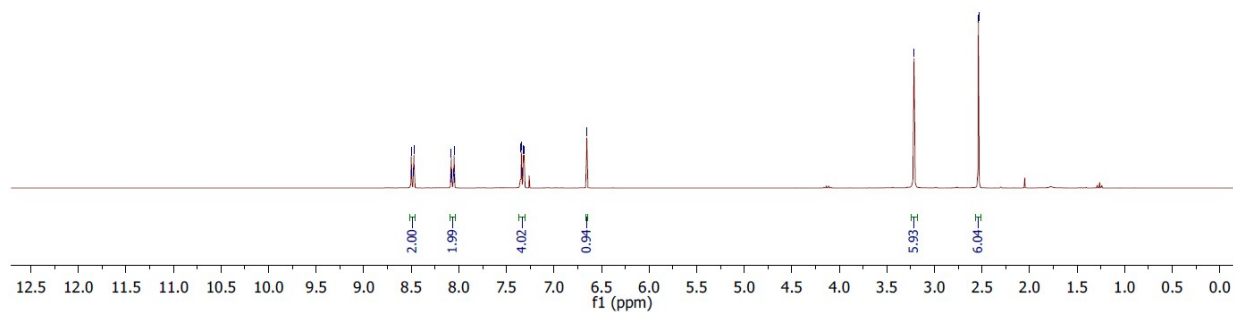

150917.312.11.fid  
Jian-Bo Feng 39a183-12  
Au13C CDCl3 /opt/topspin 1509 12

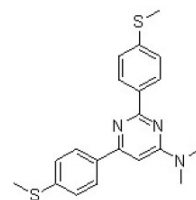

163.31  
162.96  
162.29  
141.02  
135.87  
135.42  
128.77  
127.50  
126.23  
125.81  
95.34  
37.37  
15.67

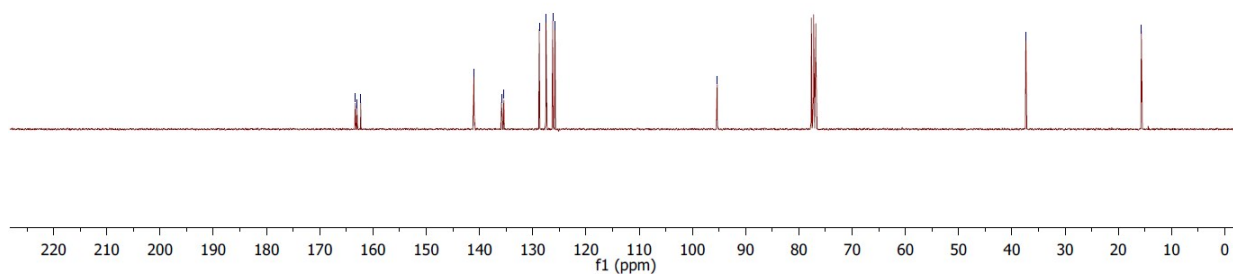

150918.324.10.fid  
Jian-Bo Feng 39a183-6  
Au1H CDCl3 /opt/topspin 1509 24

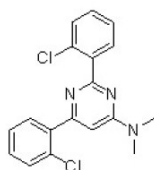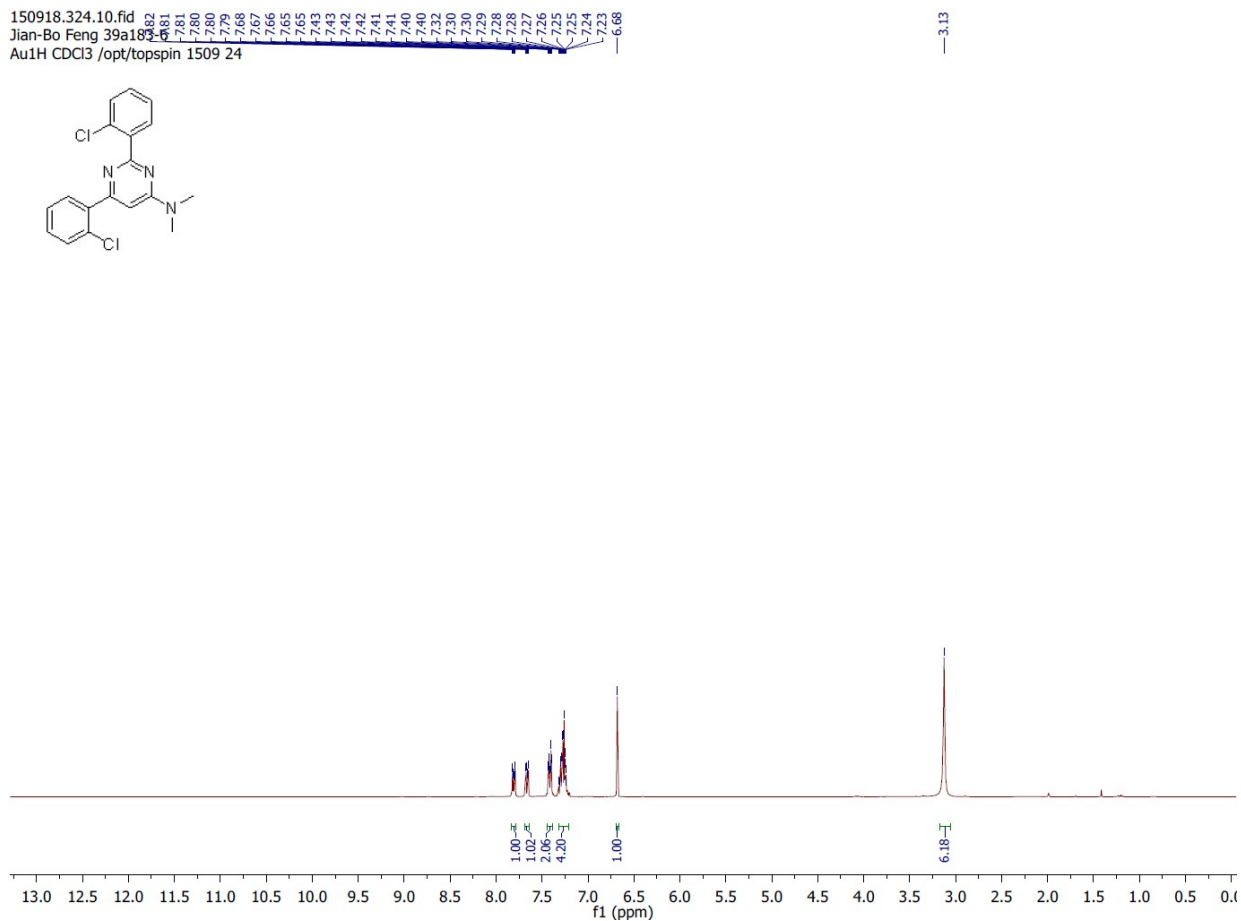

150918.324.11.fid  
Jian-Bo Feng 39a183-6  
Au13C CDCl3 /opt/topspin 1509 24

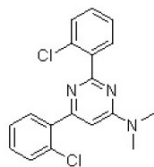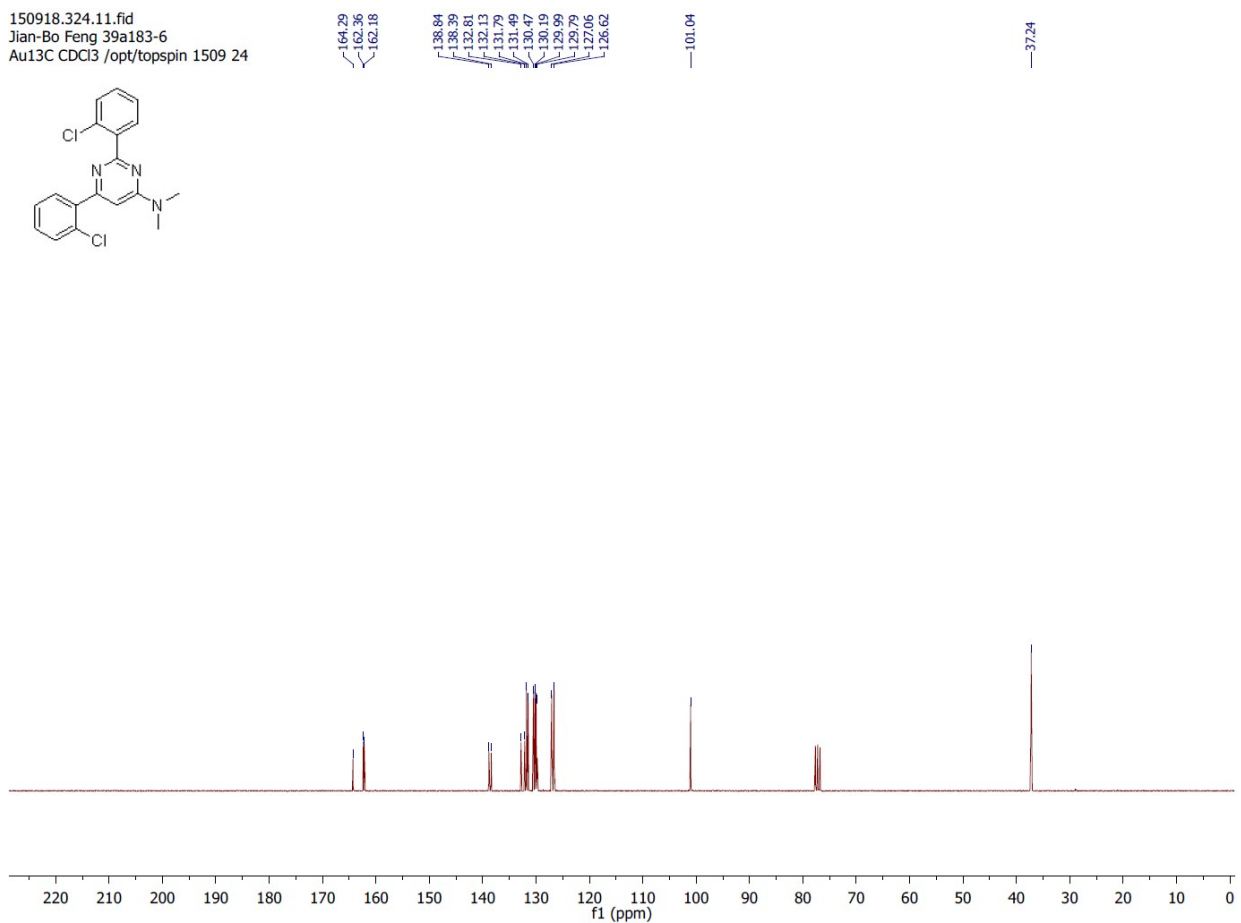

150921.f326.11.fid  
 Jian-Bo Feng 39a183-7  
 PROTON CDCl3 {C:\Bruker\TopSpin3.2PL6} 1509 26

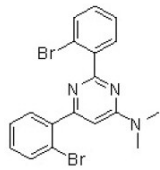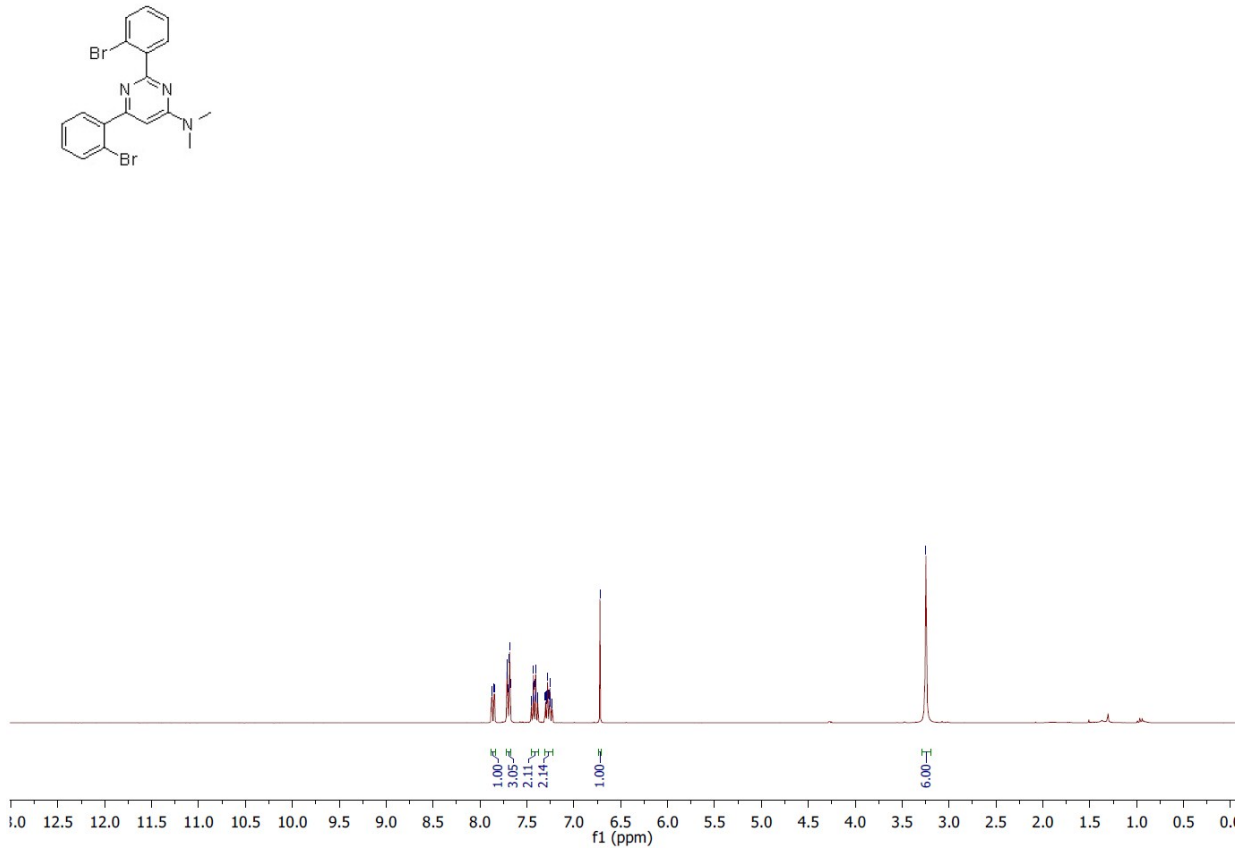

150921.f326.11.fid  
 Jian-Bo Feng 39a183-7  
 C13CPD CDCl3 {C:\Bruker\TopSpin3.2PL6} 1509 26

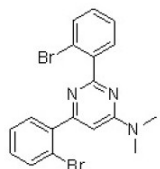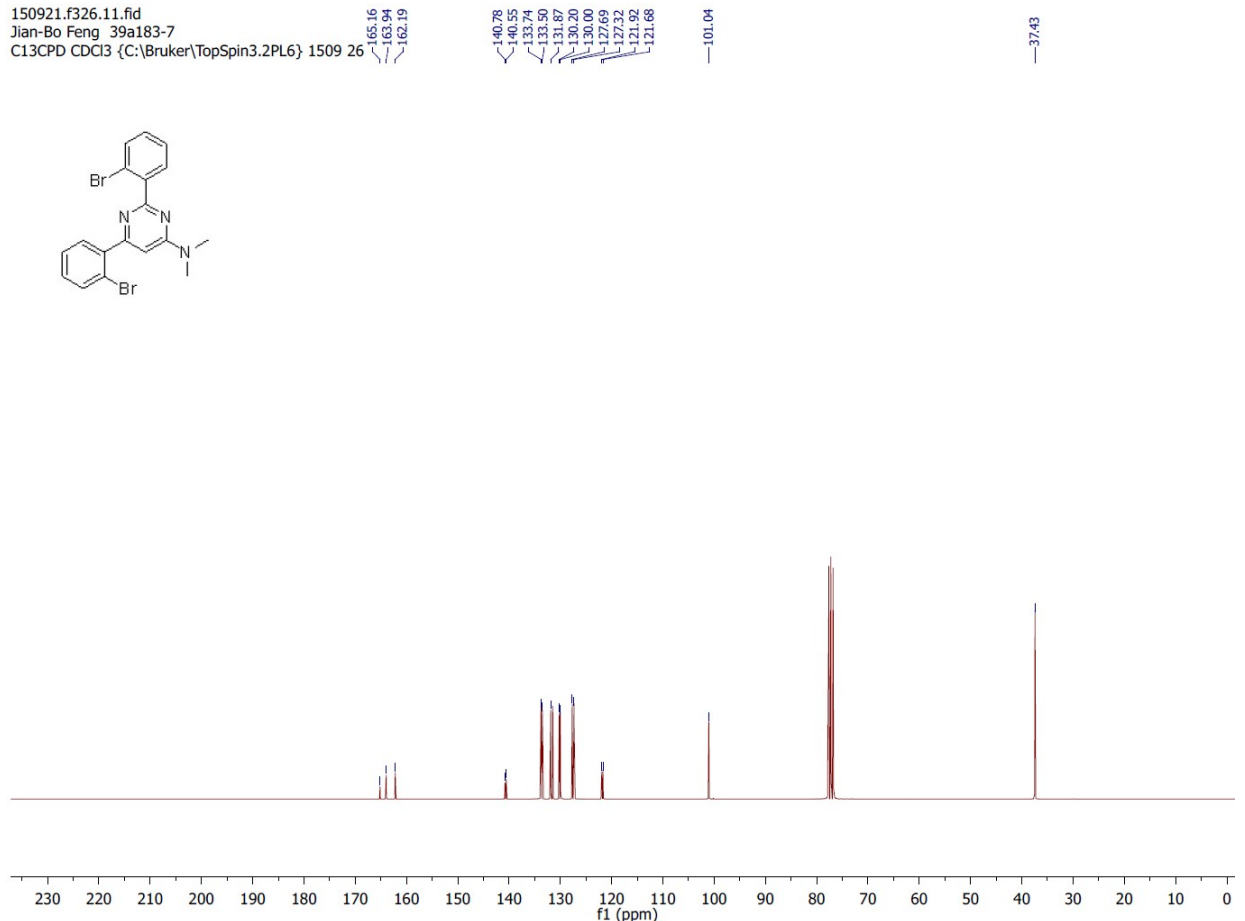

150921.320.10.fid  
Jian-Bo Feng 39a185-6  
Au1H CDCl3 /opt/topspin 1509 20

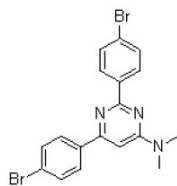

8.42  
8.40  
8.00  
7.97  
7.62  
7.61  
7.60  
7.59  
7.57  
6.67

3.22

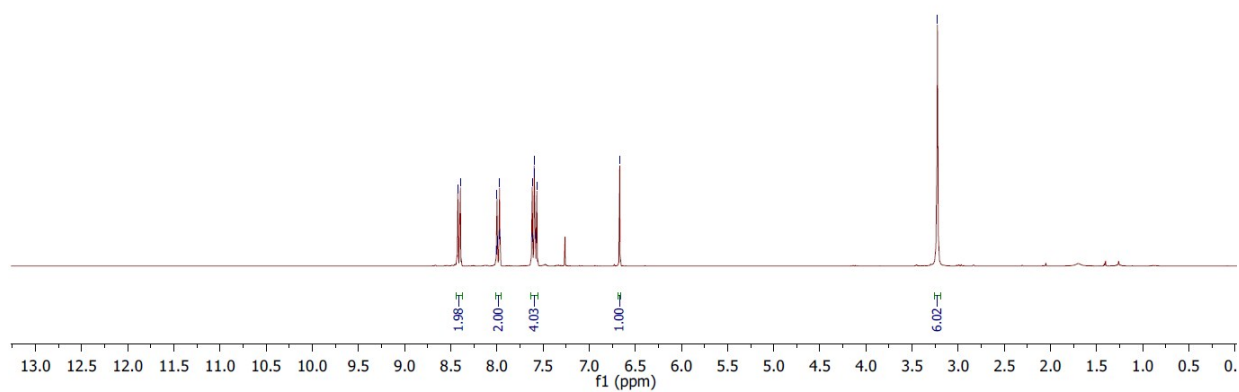

150921.320.11.fid  
Jian-Bo Feng 39a185-6  
Au13C CDCl3 /opt/topspin 1509 20

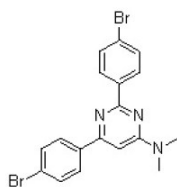

163.31  
162.61  
161.88  
137.85  
137.56  
131.94  
131.47  
130.06  
128.76  
124.92  
124.52

96.05

37.46

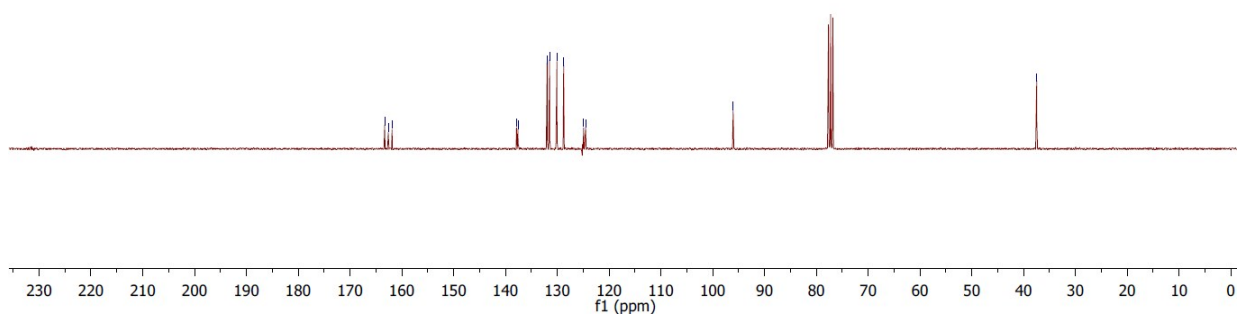



150923.322.10.fid  
Jian-Bo Feng 39a183-2  
Au1H CDCl3 /opt/topspin 1509 22

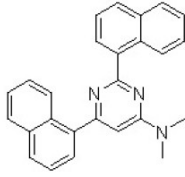

8.93  
8.93  
8.93  
8.92  
8.91  
8.90  
8.89  
7.94  
7.92  
7.91  
7.91  
7.91  
7.89  
7.87  
7.84  
7.83  
7.71

3.26

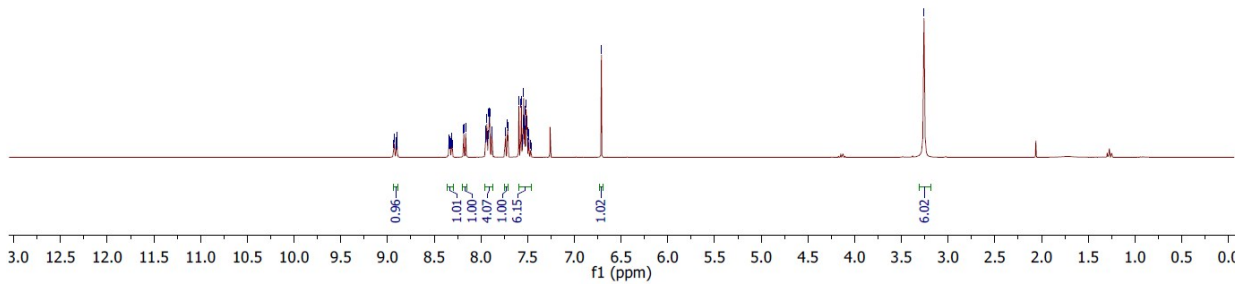

150923.322.11.fid  
Jian-Bo Feng 39a183-2  
Au13C CDCl3 /opt/topspin 1509 22

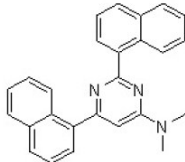

166.06  
165.63  
162.75  
138.31  
137.48  
134.29  
134.07  
131.55  
131.28  
129.90  
129.40  
128.04  
128.34  
127.77  
127.26  
126.74  
126.61  
126.30  
126.11  
125.98  
125.67  
125.45  
125.43  
101.07

37.48

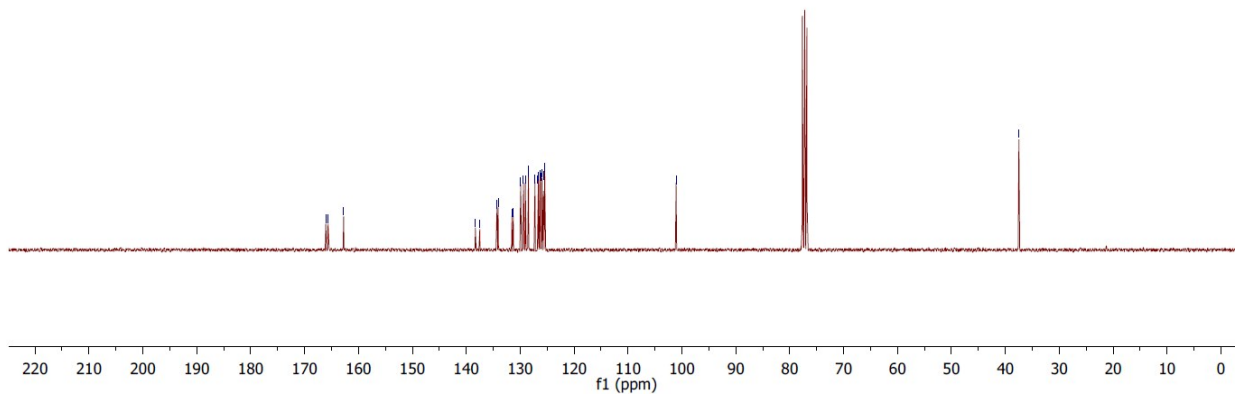

150923.326.10.fid  
Jian-Bo Feng 39a188-1-2  
Au1H CDCl3 /opt/topspin 1509 26

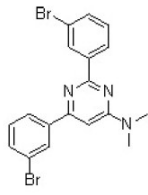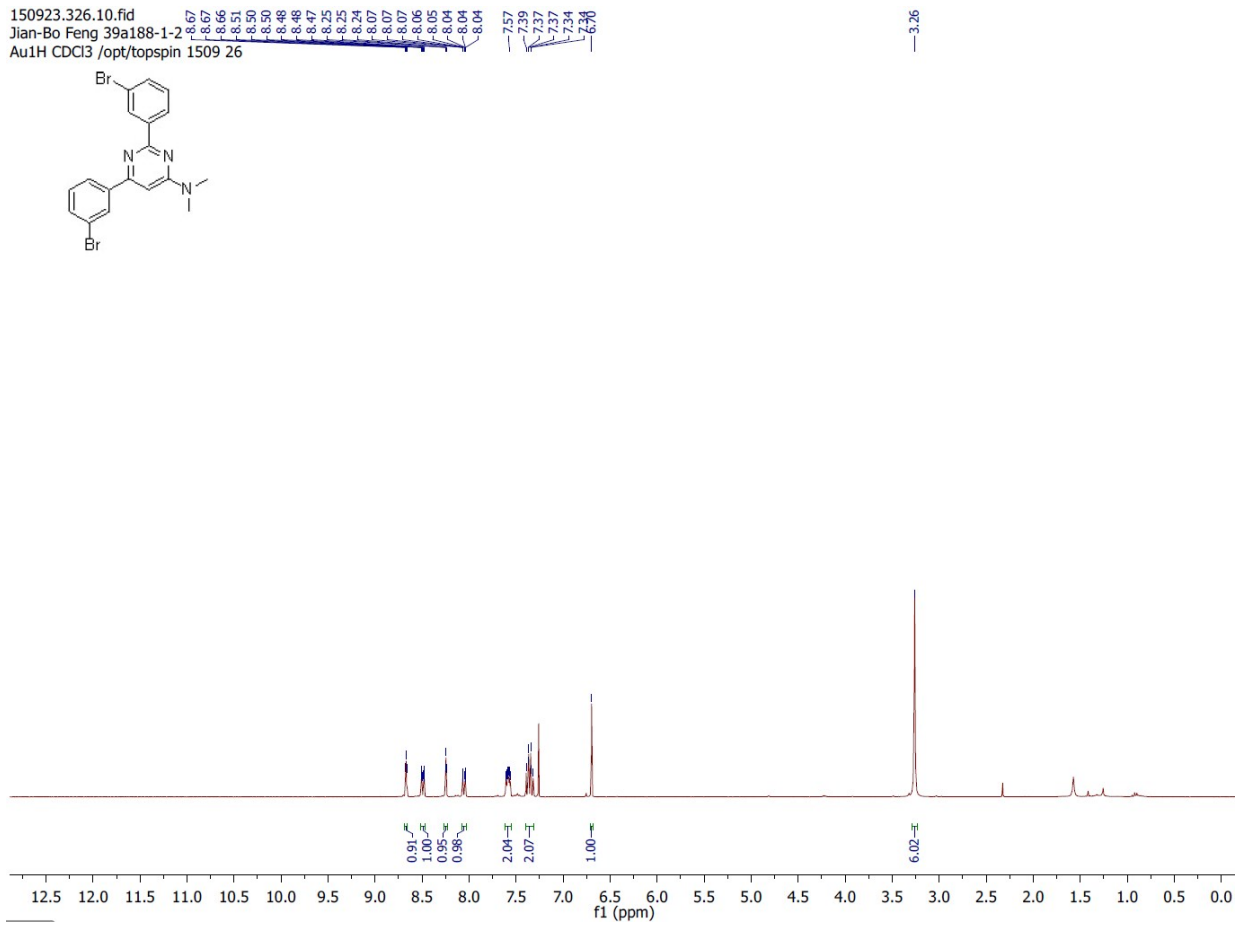

150923.326.11.fid  
Jian-Bo Feng 39a188-1-2  
Au13C CDCl3 /opt/topspin 1509 26

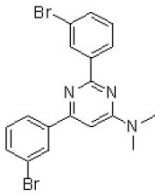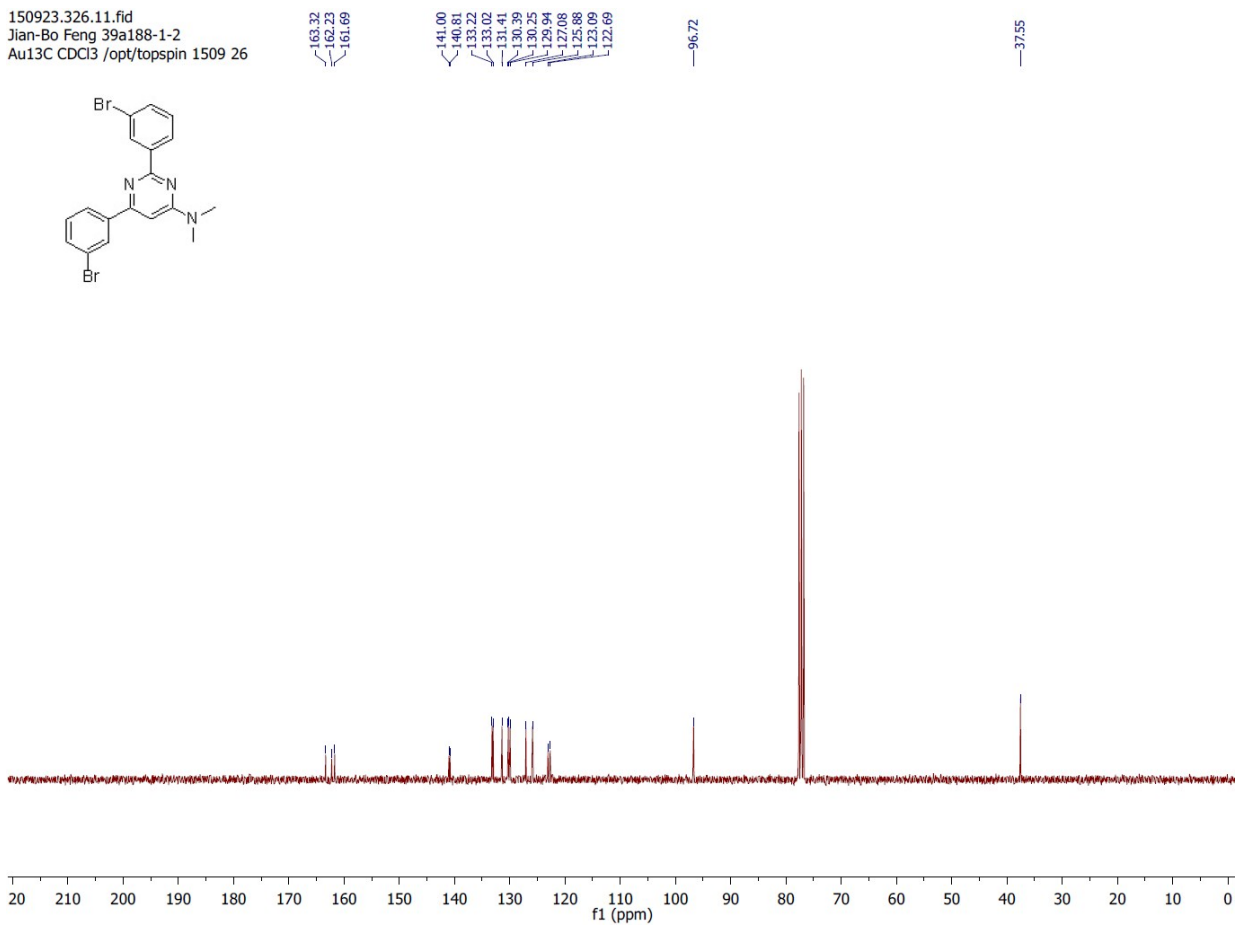

150924.316.10.fid  
Jian-Bo Feng 39a193-5  
Au1H CDCl3 /opt/topspin 1509 16

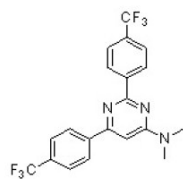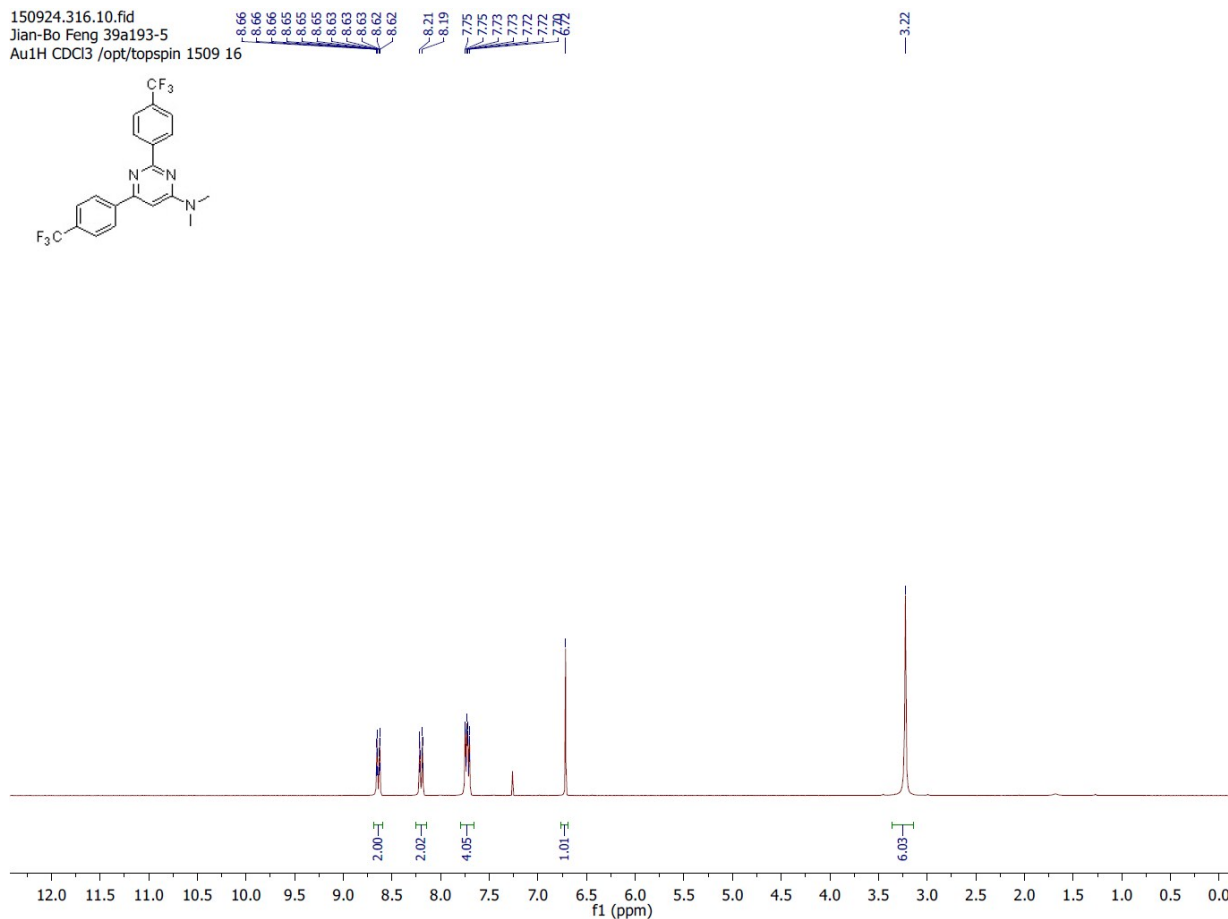

150924.316.11.fid  
Jian-Bo Feng 39a193-5  
Au13C CDCl3 /opt/topspin 1509 16

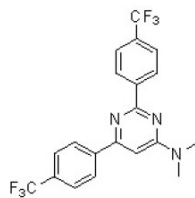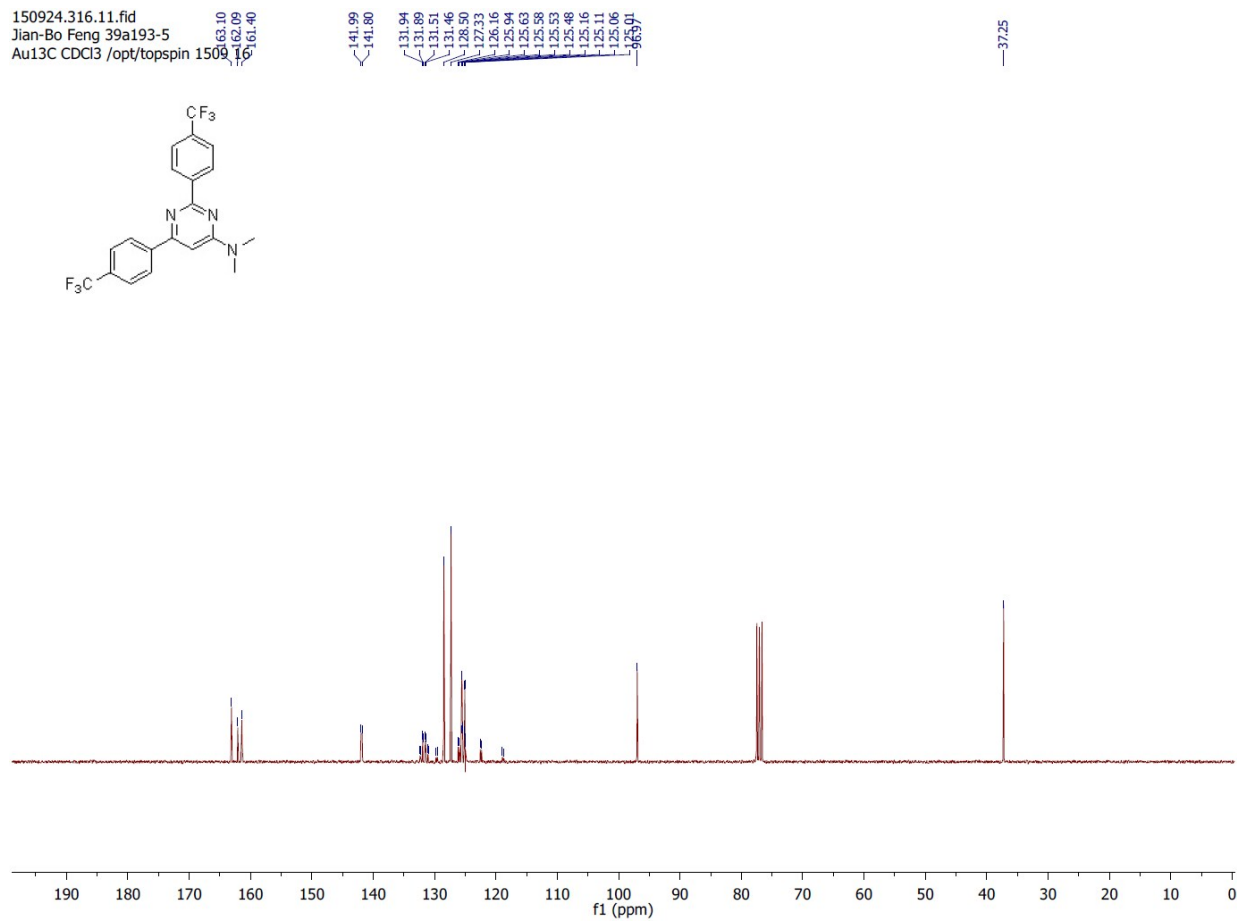

150924.f322.10.fid  
Jian-Bo Feng 39a193-2  
PROTON CDCl3 {C:\Bruker\TopSpin3.2PL6} 1509 22

8.69  
8.68  
8.57  
8.56  
8.16  
8.14  
8.13  
7.14  
7.13  
7.11  
7.10  
7.08

3.24

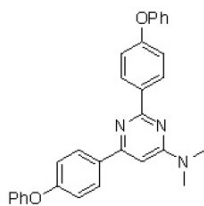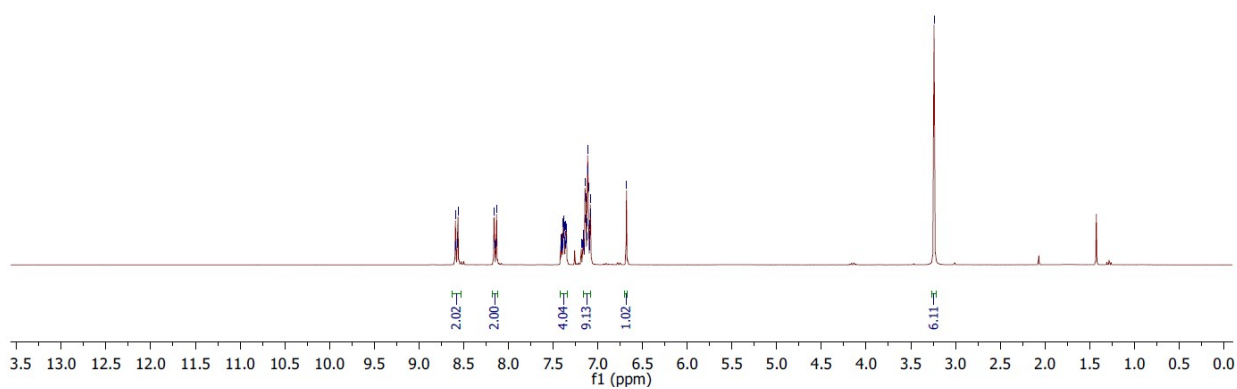

150924.f322.11.fid  
Jian-Bo Feng 39a193-2  
C13CPD CDCl3 {C:\Bruker\TopSpin3.2PL6} 1509 22

163.35  
162.92  
160.36  
159.72  
157.17  
156.97  
134.23  
133.80  
130.14  
130.01  
129.94  
129.82  
127.59  
127.59  
119.30  
118.75  
118.41

95.24

37.36

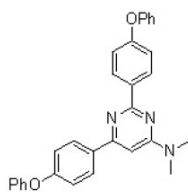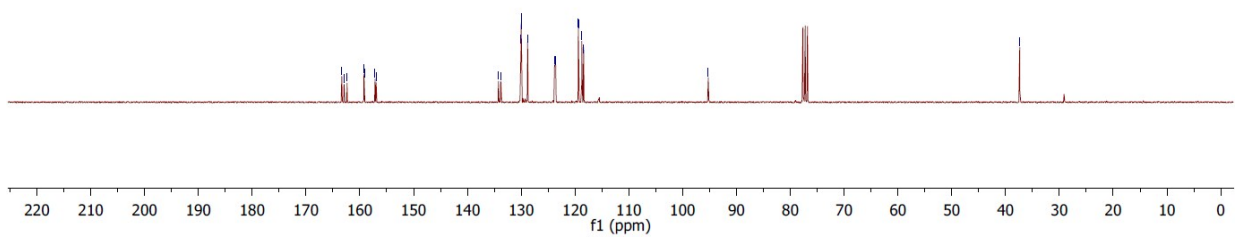

150921.319.10.fid  
Jian-Bo Feng 39a185-4  
Au1H CDCl3 /opt/topspin 1509 19

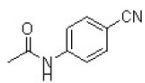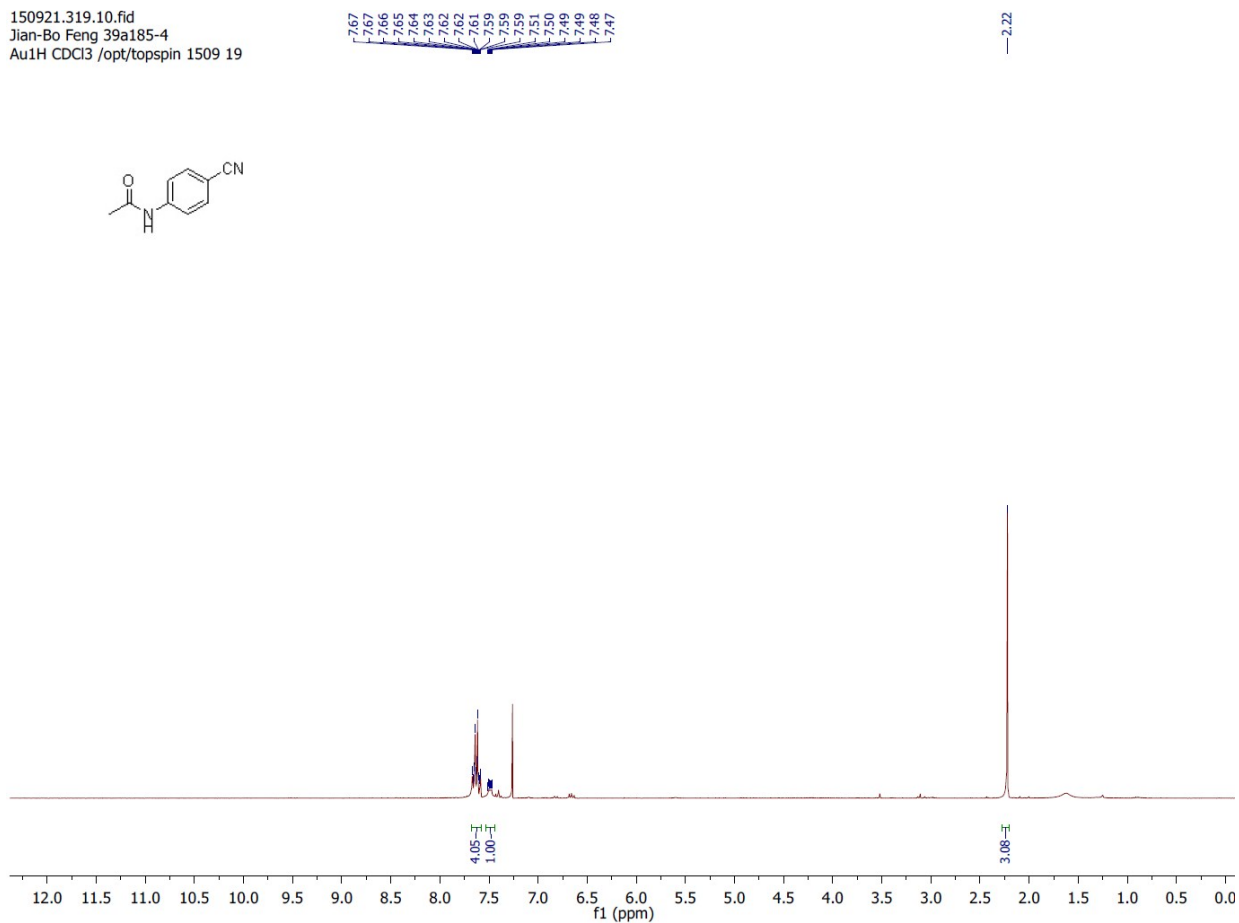

150921.319.11.fid  
Jian-Bo Feng 39a185-4  
Au13C CDCl3 /opt/topspin 1509 19

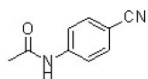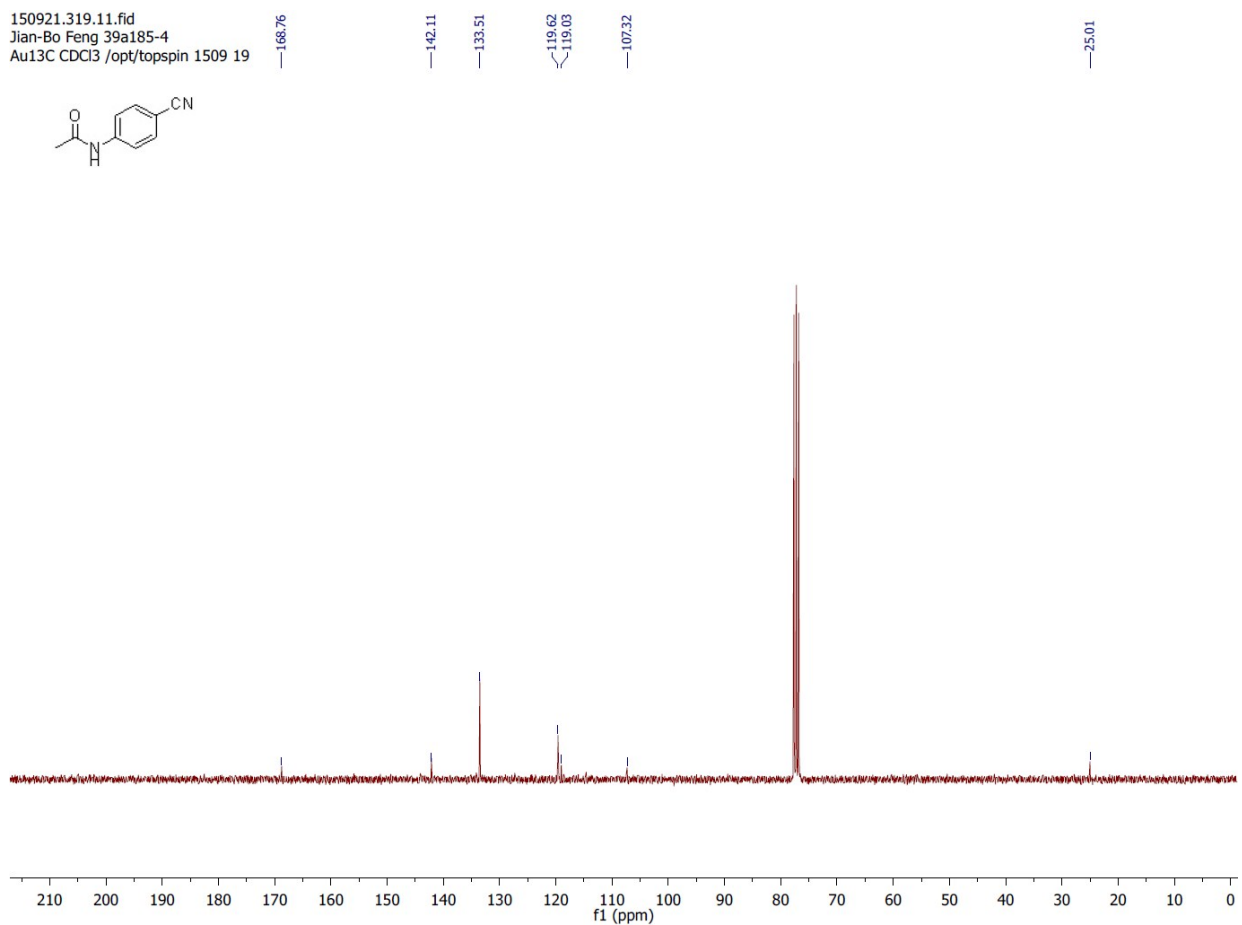

150924.f324.10.fid  
Jian-Bo Feng 39a189-1-2  
PROTON CDCl3 {C:\Bruker\TopSpin3.2PL6} 1509 24

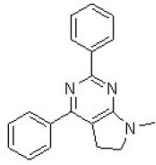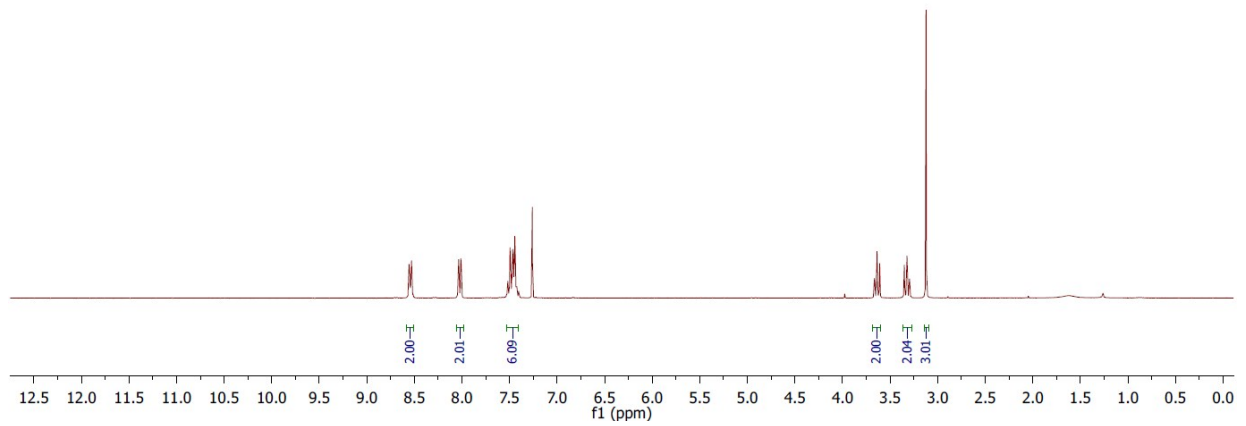

150924.f324.11.fid  
Jian-Bo Feng 39a189-1-2  
C13CPD CDCl3 {C:\Bruker\TopSpin3.2PL6} 1509 24

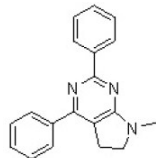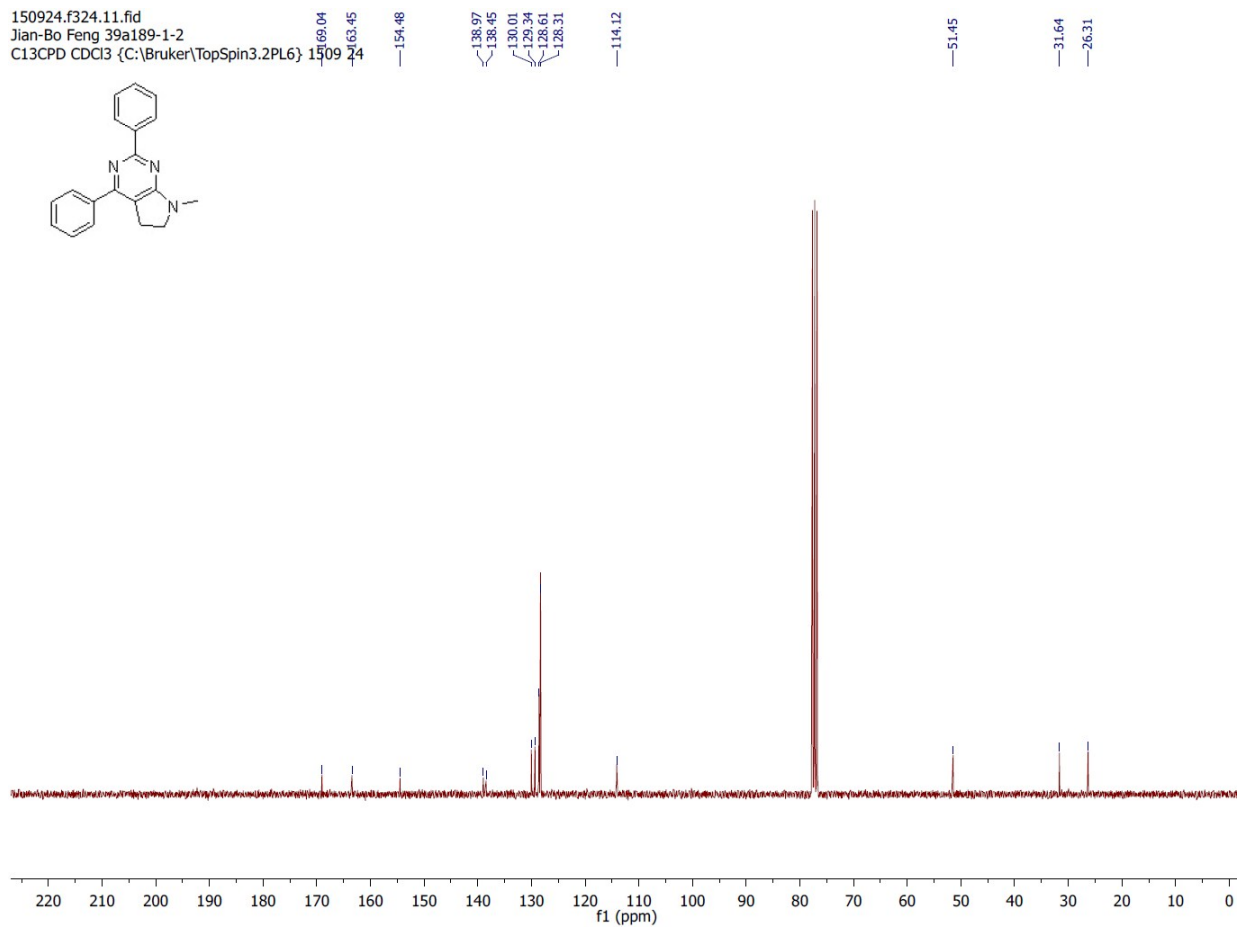

151009.308.10.fid  
Feng/ 39a22-1  
Au1H CDCl3 /opt/topspin 1510 8

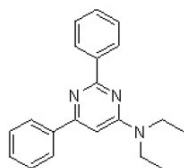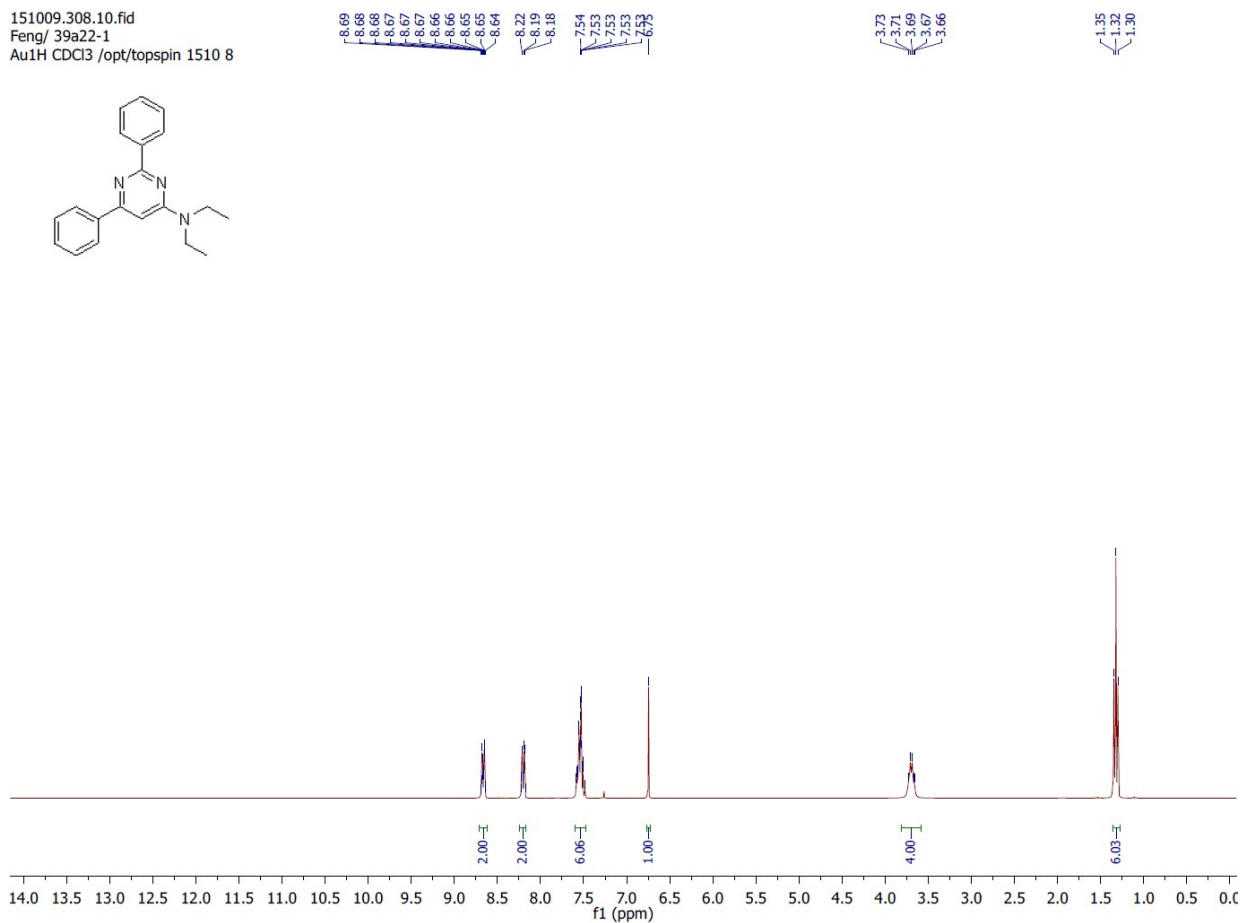

151009.308.11.fid  
Feng/ 39a22-1  
Au13C CDCl3 /opt/topspin 1510 8

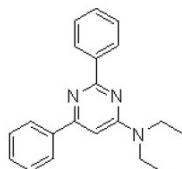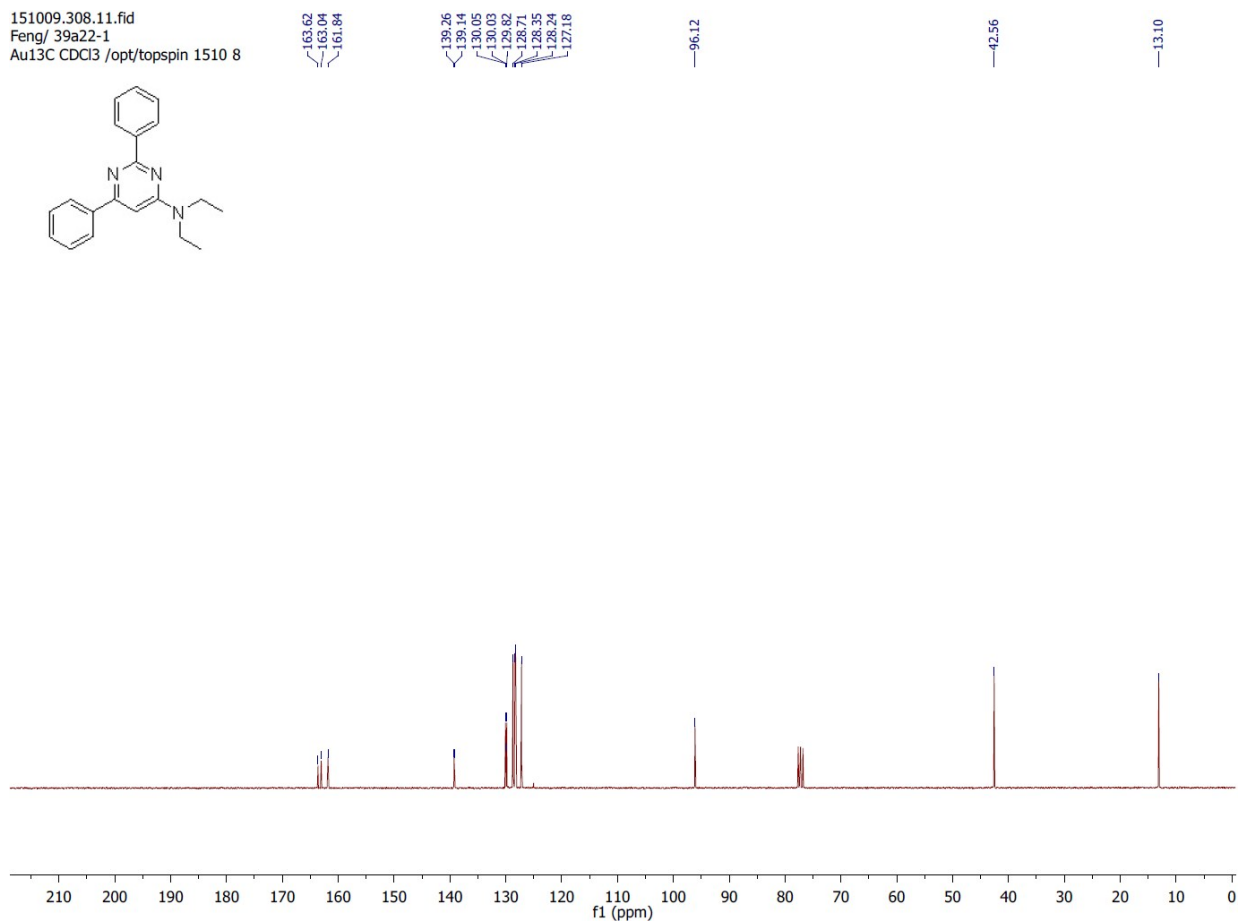

151009.309.11.fid  
Feng/ 39a22-2  
Au1H CDCl3 /opt/topspin 1510 9

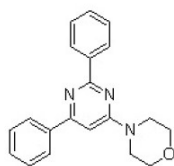

8.98  
8.57  
8.56  
8.55  
8.16  
8.14  
8.13  
7.50  
7.49  
7.48  
7.881

3.87  
3.87  
3.86  
3.85  
3.84  
3.81  
3.79  
3.78  
3.77

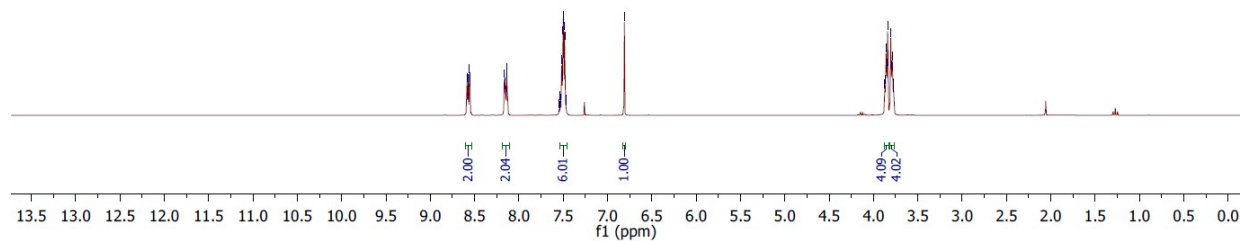

151009.309.10.fid  
Feng/ 39a22-2  
Au13C CDCl3 /opt/topspin 1510 9

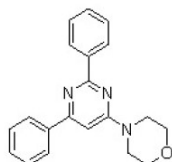

163.88  
163.72  
163.46  
138.71  
138.59  
130.41  
130.22  
128.82  
128.42  
128.37  
127.24

96.52

66.79

44.50

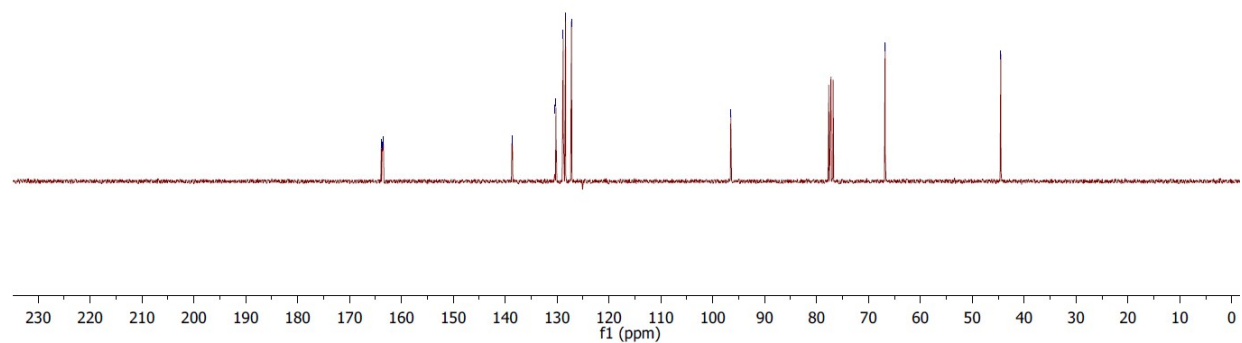



151013.f327.10.fid  
Jian-Bo Feng 39a25-2  
PROTON CDCl3 {C:\Bruker\TopSpin3.2PL6} 1510 27

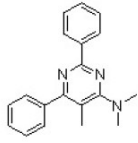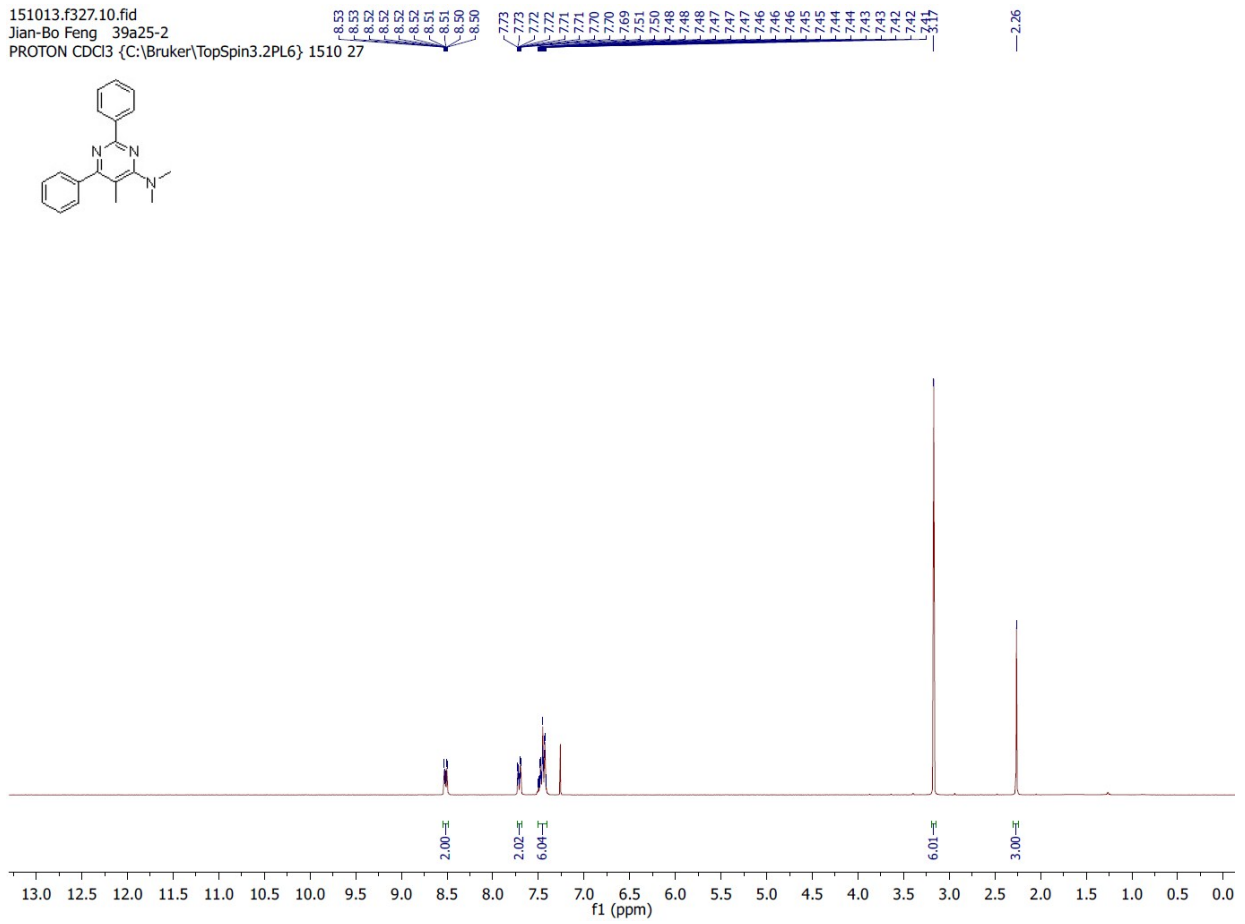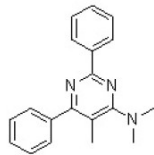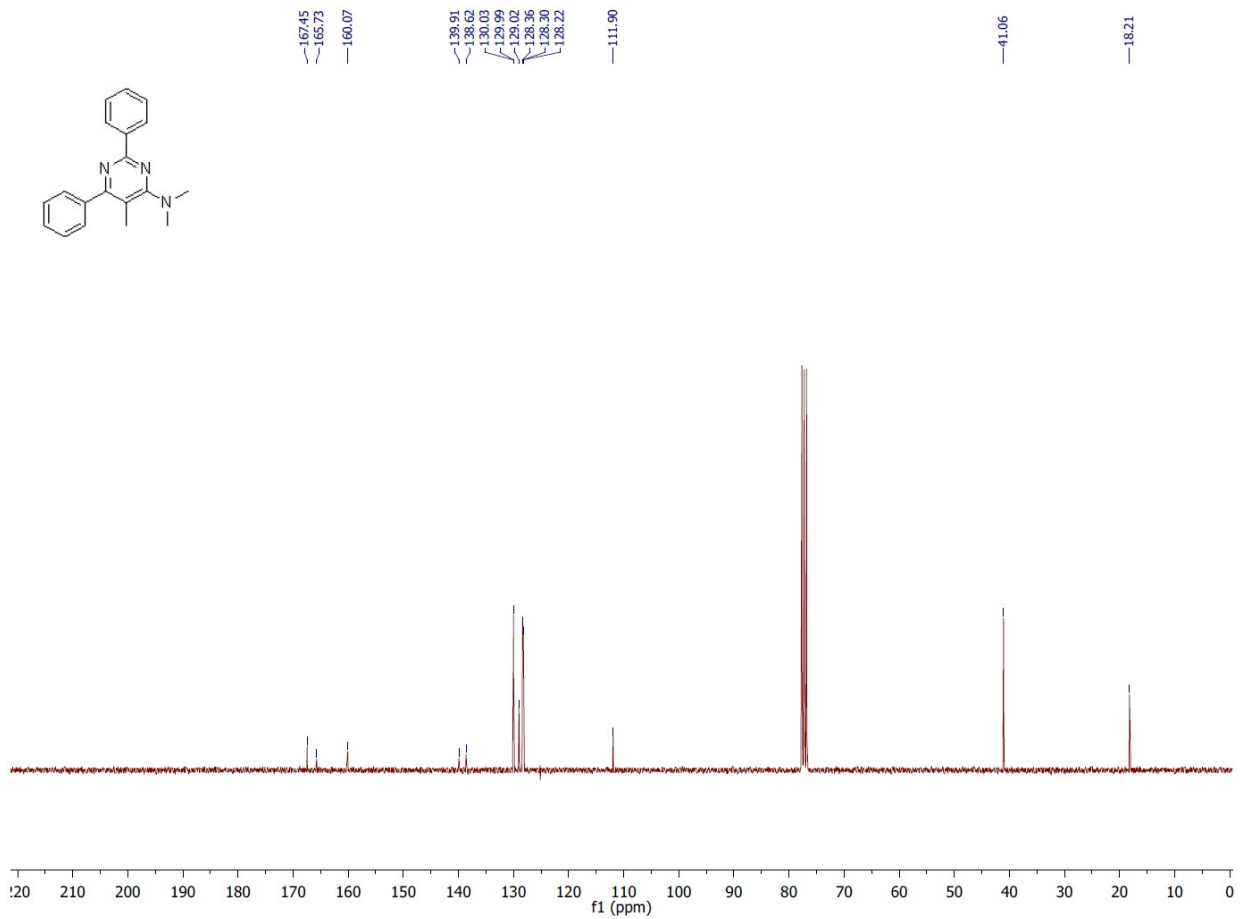

151021.f340.10.fid  
 Jian-Bo Feng 39a49-1  
 PROTON CDCl3 {C:\Bruker\TopSpin3.2PL6} 1510 40

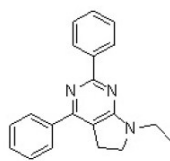

7.855  
7.854  
7.853  
7.852  
7.851  
8.03  
8.01  
8.00  
7.50  
7.49  
7.49  
7.48  
7.48  
7.47  
7.47  
7.46  
7.46  
7.45  
7.45  
7.44  
7.44  
7.43  
7.43  
7.42  
7.42  
3.69  
3.67  
3.66  
3.66  
3.64  
3.62  
3.60  
3.35  
3.32  
3.32  
3.29

1.30  
1.27  
1.25

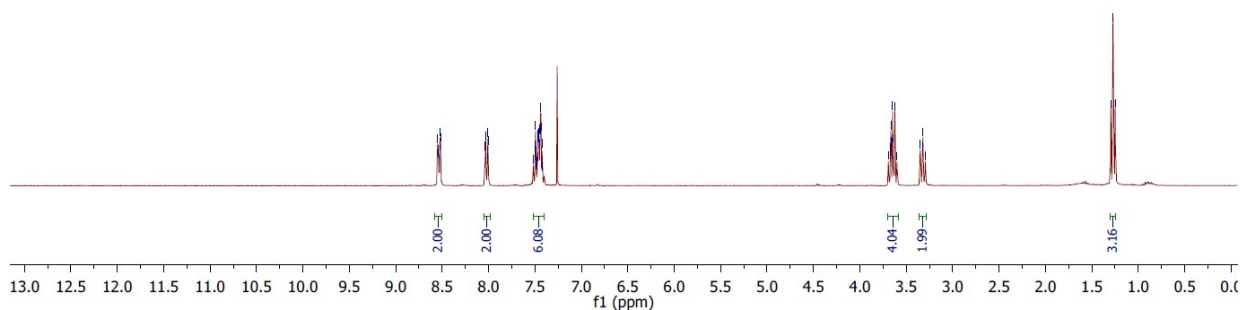

151022.324.10.fid  
 Jian-Bo Feng 39a49-1  
 Au13C CDCl3 /opt/topspin 1510 24

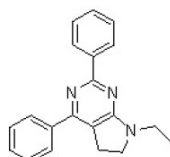

168.51  
163.37  
154.41  
138.95  
138.42  
129.99  
128.31  
128.10  
128.30  
114.38  
48.39  
39.18  
26.16  
12.55

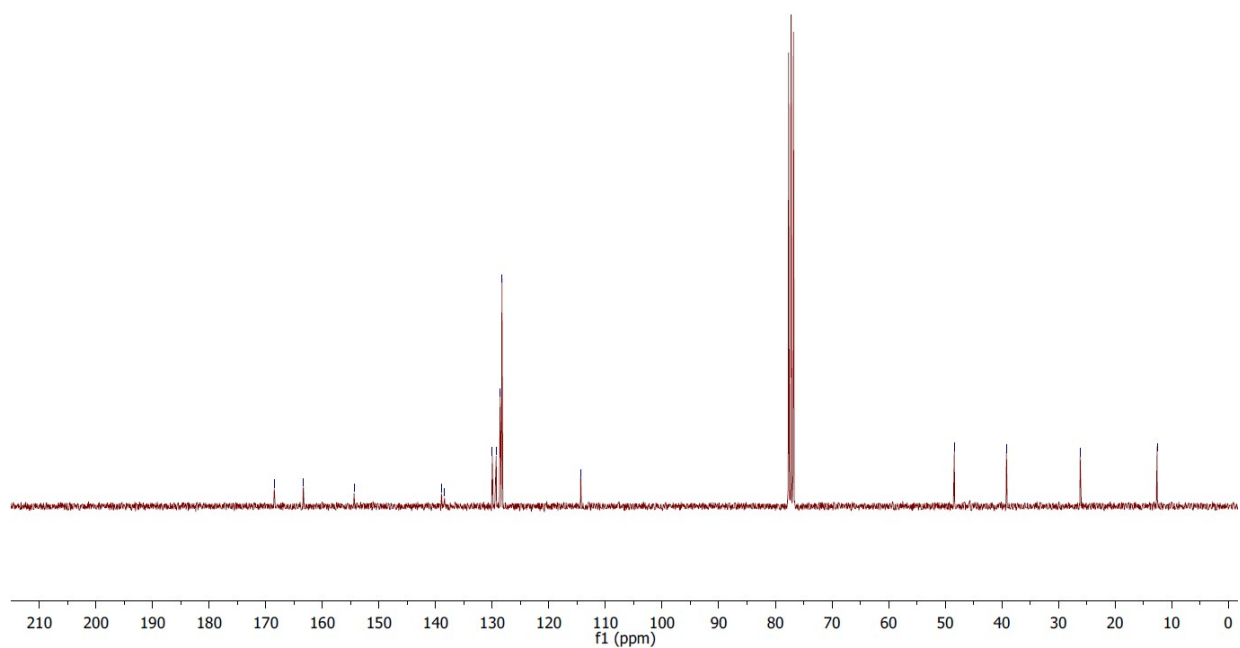

151021.f341.10.fid  
 Jian-Bo Feng 39a49-2  
 PROTON CDCl3 {C:\Bruker\TopSpin3.2PL6} 1510 41

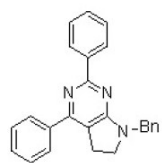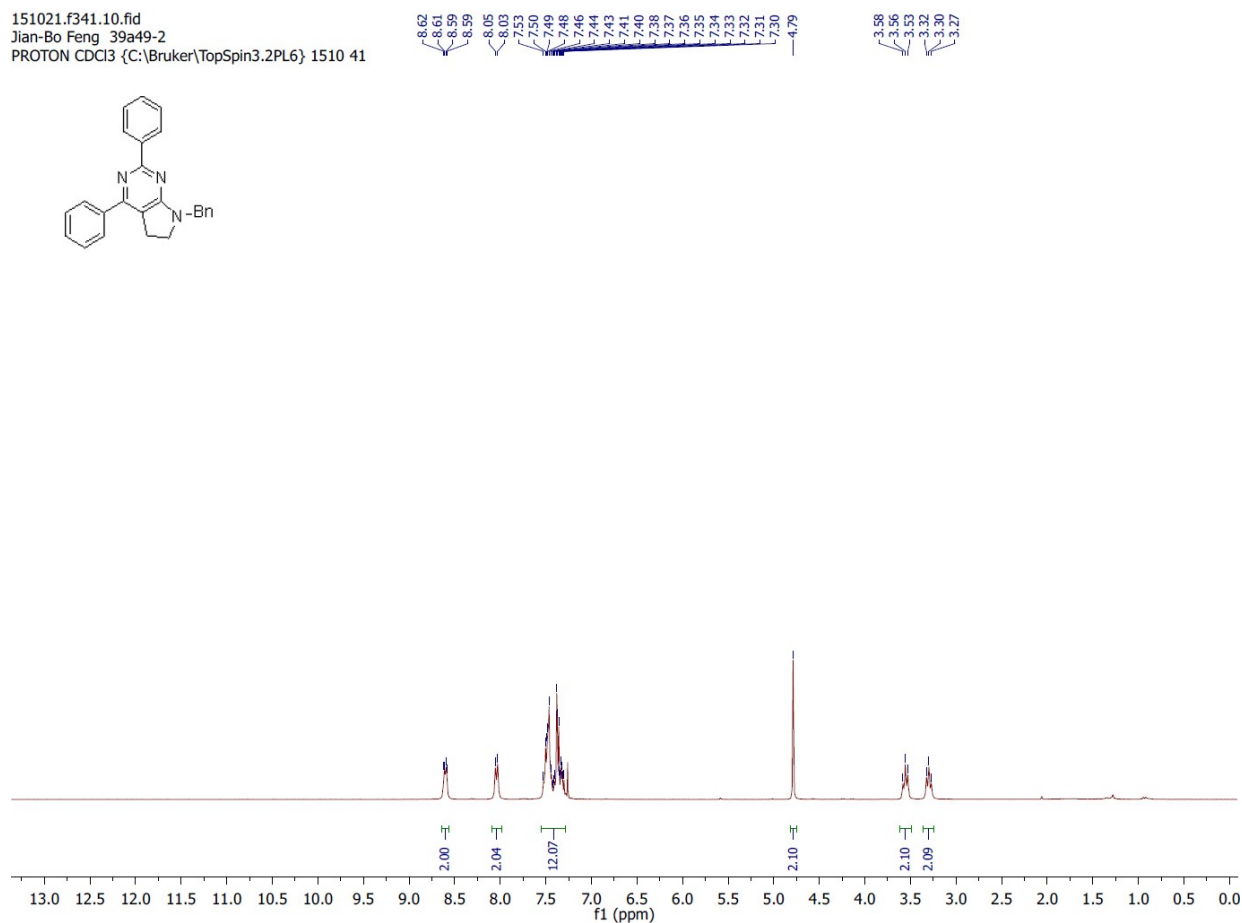

151021.f341.11.fid  
 Jian-Bo Feng 39a49-2  
 C13CPD CDCl3 {C:\Bruker\TopSpin3.2PL6} 1510 41

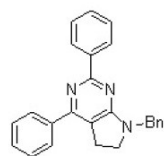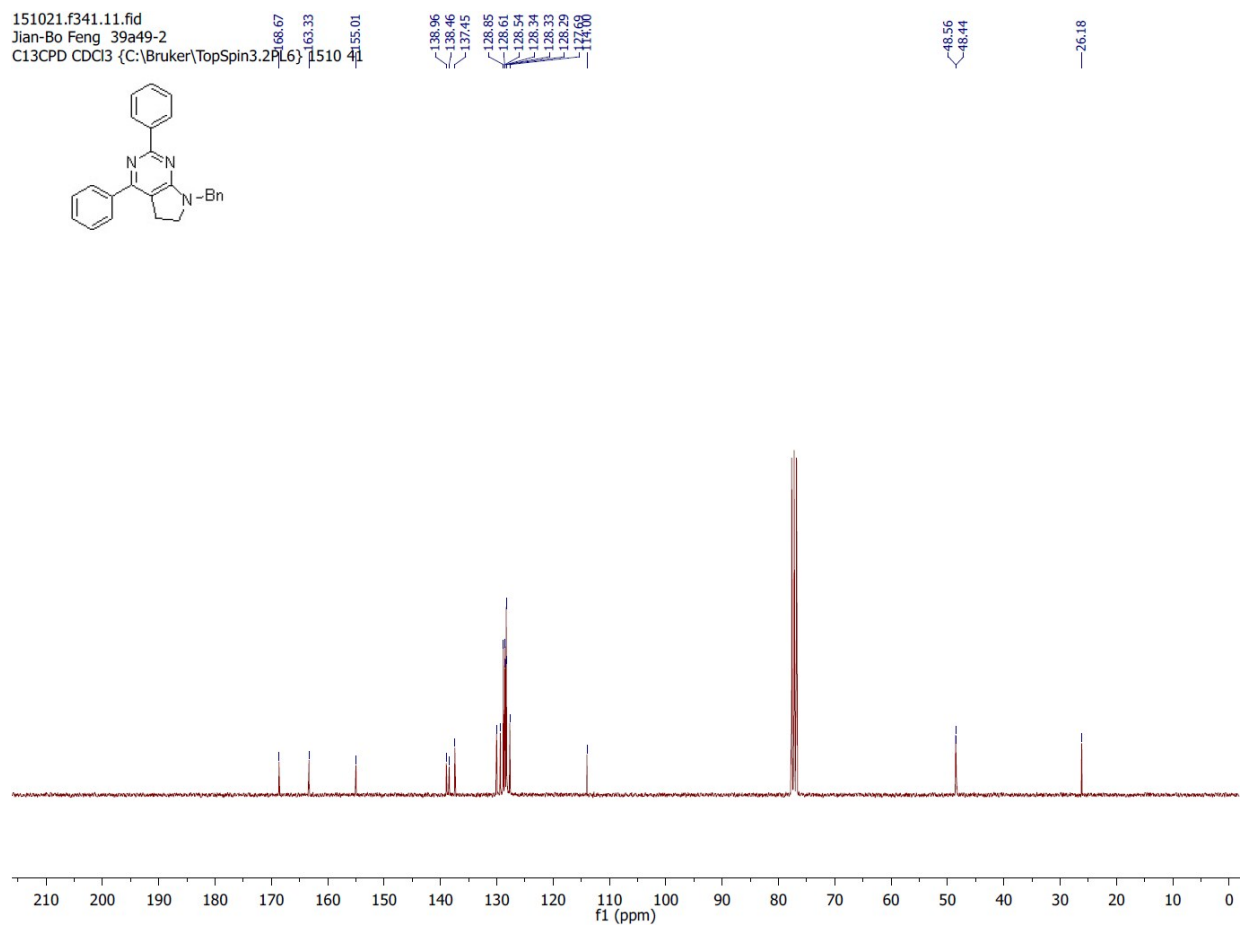

151028.f310.11.fid  
 Feng/ 39a63  
 PROTON CDCI3 {C:\Bruker\TopSpin3.2PL6} 1510 10

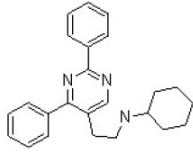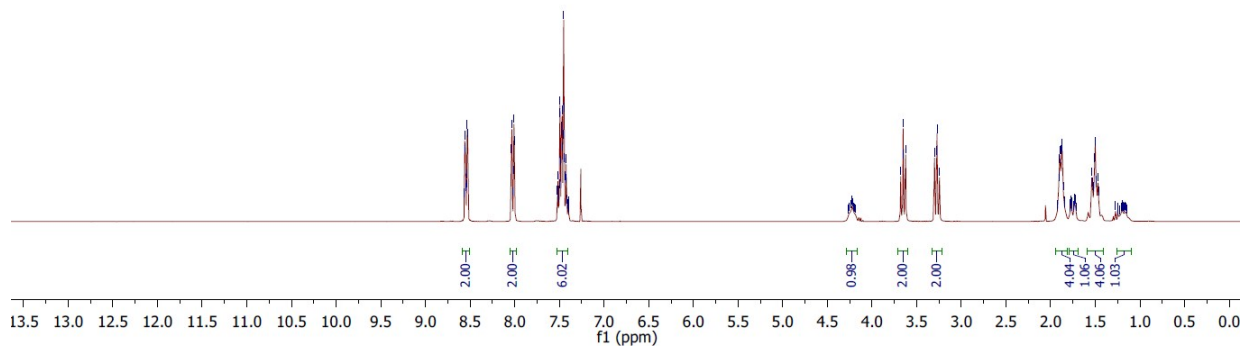

151028.f310.11.fid  
 Feng/ 39a63  
 C13CPD CDCI3 {C:\Bruker\TopSpin3.2PL6} 1510 10

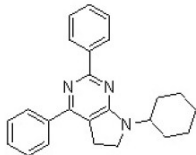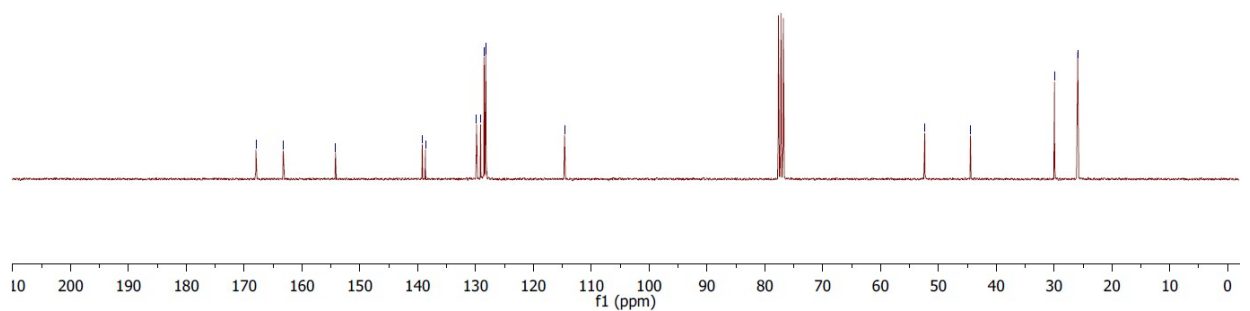

150929.f307.12.fid  
Feng/ 39a 194-2  
PROTON CDCl3 {C:\Bruker\TopSpin3.2PL6} 1509 7

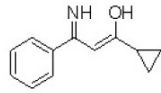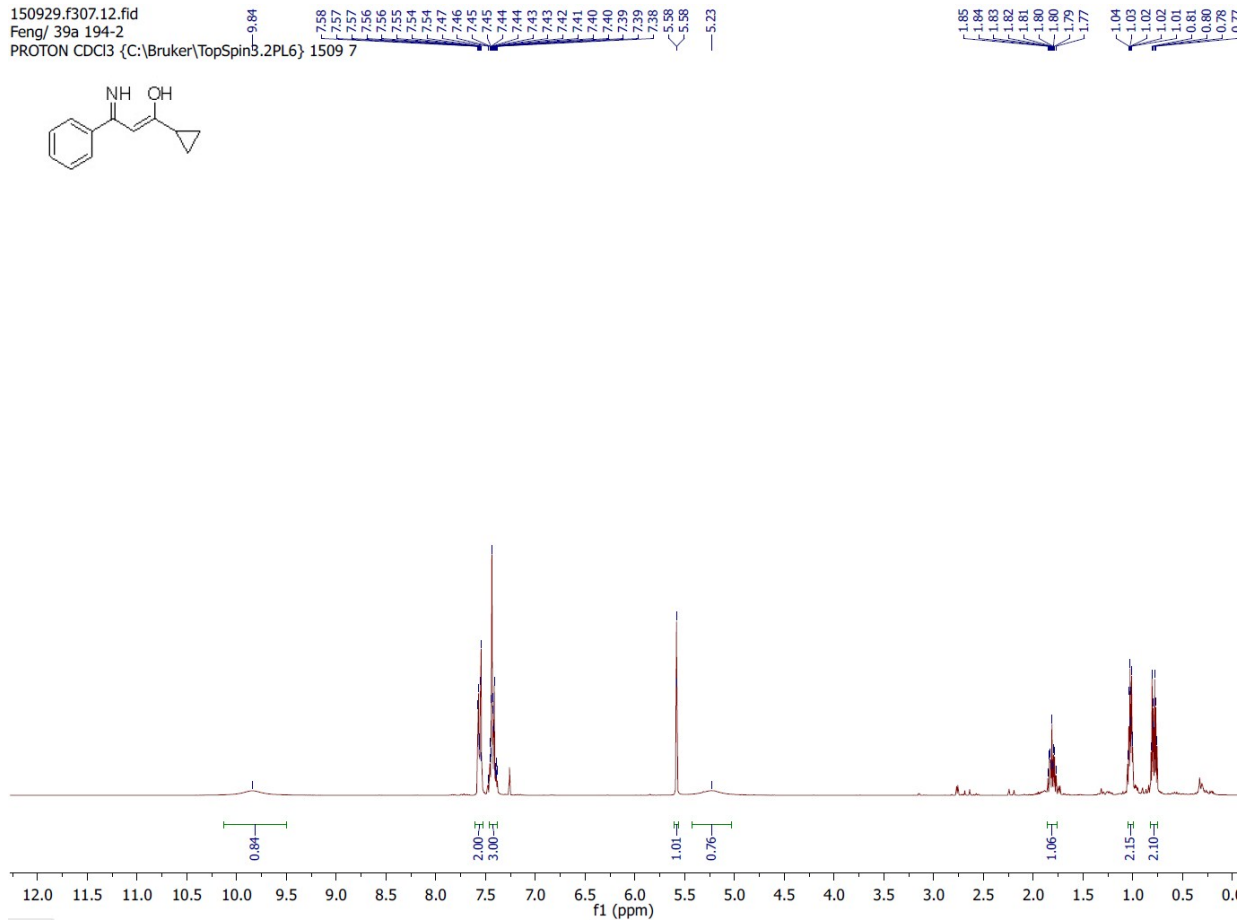

150929.f307.10.fid  
Feng/ 39a 194-2  
C13CPD CDCl3 {C:\Bruker\TopSpin3.2PL6} 1509 7

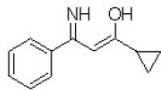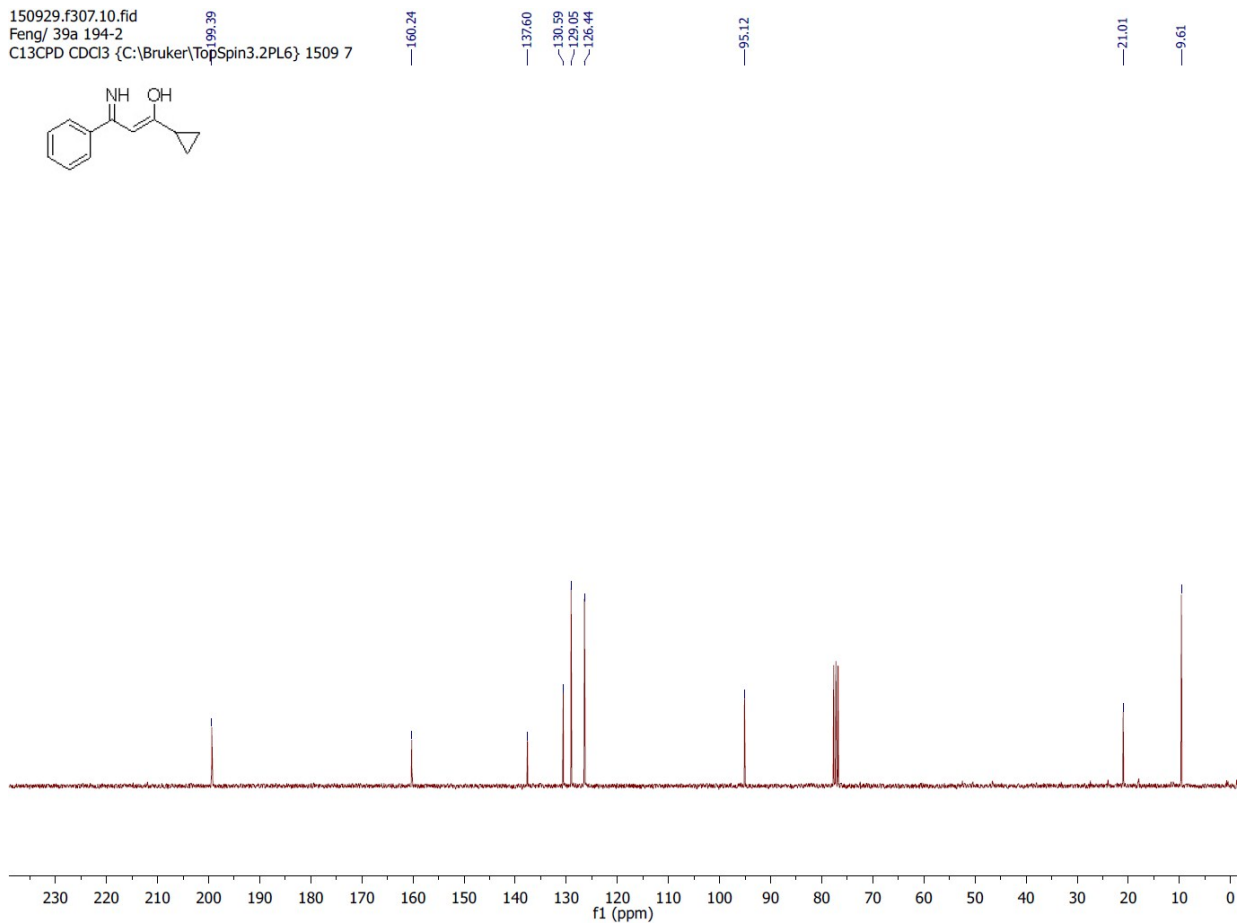

Supplement: c5ra24292d1.pdf [file c5ra24292d1.pdf]
